# Supplementary material for: Fighting misinformation on social media using crowdsourced judgments of news source quality
Source: PubMed Central journal article supplement — Proc Natl Acad Sci U S A. 2019 Jan 28;116(7):2521–6. doi: 10.1073/pnas.1806781116 (PMC6377495; doi:10.1073/pnas.1806781116), 2019-01-28
Supplement: pnas.1806781116.sapp.pdf [file pnas.1806781116.sapp.pdf]

## Supporting Information

*for*

Fighting misinformation on social media using crowdsourced judgments of news source quality

### Contents

|                                                                                                |     |
|------------------------------------------------------------------------------------------------|-----|
| 1. Full list of news sources.....                                                              | S2  |
| 2. Average trust and familiarity ratings .....                                                 | S3  |
| 3. Robustness across subgroups.....                                                            | S6  |
| 4. Participant-level analysis of relationship with fact-checker ratings .....                  | S10 |
| 5. Cognitive reflection and media source discernment.....                                      | S11 |
| 6. The relationship between familiarity and trust .....                                        | S12 |
| 7. Regression model details for participant-level analyses associated with Figure 1 .....      | S16 |
| 8. Partisanship versus ideology.....                                                           | S18 |
| 9. Partisan differences in trust are robust to accounting for political slant of sources ..... | S19 |
| 10. Full materials – Study 1 .....                                                             | S23 |
| 11. Full materials – Study 2 .....                                                             | S39 |
| 12. Full materials – Expert survey .....                                                       | S58 |
| 13. Supplementary References.....                                                              | S69 |

## 1. Full list of news sources

|               | <b>Mainstream Media</b>                                                                                                                                                    | <b>Hyper-Partisan</b>                                                                                                                                                                                                                                                                                | <b>Fake News</b>                                                                                                                                                                                                                                                                                      |
|---------------|----------------------------------------------------------------------------------------------------------------------------------------------------------------------------|------------------------------------------------------------------------------------------------------------------------------------------------------------------------------------------------------------------------------------------------------------------------------------------------------|-------------------------------------------------------------------------------------------------------------------------------------------------------------------------------------------------------------------------------------------------------------------------------------------------------|
| Study 1       | bloomberg.com<br>fortune.com<br>theguardian.com<br>npr.org<br>salon.com<br>newsweek.com<br>politico.com<br>pbs.org<br>economist.com<br>nbc.com                             | ahtribune.com<br>bipartisanreport.com<br>chicksontheright.com<br>dailynewsbin.com<br>heatst.com<br>newcenturytimes.com<br>palmerreport.com<br>pamelageller.com<br>redflagnews.com<br>regated.com<br>rightwingnews.com<br>thefederalistpapers.org<br>trueactivist.com<br>usuncut.com<br>youngcons.com | americannews.com<br>civictribune.com<br>dailyheadlines.net<br>empireherald.com<br>globalrealnews.com<br>news4ktla.com<br>newsexaminer.net<br>thelastlineofdefense.org<br>theracketreport.com<br>usasupreme.com<br>uspoliticsinfo.com<br>worldnewsdailyreport.com                                      |
| Studies 1 & 2 | abcnews.go.com<br>cbsnews.com<br>cnn.com<br>foxnews.com<br>huffingtonpost.com<br>msnbc.com<br>nytimes.com<br>usatoday.com<br>washingtonpost.com<br>wsj.com                 | Breitbart.com<br>commondreams.org<br>conservativetribune.com<br>dailycaller.com<br>dailykos.com<br>dailywire.com<br>infowars.com                                                                                                                                                                     | conservativedailypost.com<br>freedomdaily.com<br>notallowedto.com<br>now8news.com<br>react365.com<br>thenewyorkevening.com                                                                                                                                                                            |
| Study 2       | aol.com/news<br>Bbc.co.uk<br>bostonglobe.com<br>chicagotribune.com<br>dailymail.co.uk<br>latimes.com<br>news.yahoo.com<br>nydailynews.com<br>nypost.com<br>sfchronicle.com | activistpost.com<br>antiwar.com<br>blacklistednews.com<br>crooksandliars.com<br>dailysignal.com<br>ijr.com<br>newsmax.com<br>patriotpost.us<br>rawstory.com<br>redstate.com<br>thedailyshpeple.com<br>thepoliticalinsider.com<br>westernjournalism.com                                               | americannews.com<br>angrypatriotmovement.com<br>bb4sp.com<br>beforeitsnews.com<br>channel24news.com<br>clashdaily.com<br>dailybuzzlive.com<br>downtrend.com<br>newsbreakshere.com<br>onepoliticalplaza.com<br>realnewsrightnow.com<br>socialeverythings.com<br>whatdoesitmean.com<br>yournewswire.com |

**Table S1.** Websites shown to participants in Studies 1 and 2. Notes: ABC news was listed as abc.go.com in Study 1 and abcnews.go.com in Study 2. CBS news was listed as cbs.com in Study 1 and cbsnews.com in Study 2.

## 2. Average trust and familiarity ratings

|                  | Familiarity     |                | Trust, All Ratings |                | Trust, Familiar Ratings |                |
|------------------|-----------------|----------------|--------------------|----------------|-------------------------|----------------|
|                  | Democrat        | Republican     | Democrat           | Republican     | Democrat                | Republican     |
| Mainstream media | 0.812<br>(.391) | .760<br>(.427) | .510<br>(.320)     | .395<br>(.312) | .582<br>(.288)          | .466<br>(.296) |
| Hyper-Partisan   | .143<br>(.350)  | .150<br>(.357) | .110<br>(.195)     | .150<br>(.217) | .205<br>(.258)          | .328<br>(.285) |
| Fake News        | .084<br>(.278)  | .110<br>(.313) | .119<br>(.207)     | .150<br>(.217) | .333<br>(.288)          | .339<br>(.280) |

**Table S2.** Average fraction familiar and trust ratings by source type and preferred political party in Study 1. Shown are both trust ratings when considering all data, and when restricting to ratings where the participants indicated being familiar with the source. Standard deviations shown in parentheses.

|                  | Familiarity    |                | Trust, All Ratings |                | Trust, Familiar Ratings |                |
|------------------|----------------|----------------|--------------------|----------------|-------------------------|----------------|
|                  | Democrat       | Republican     | Democrat           | Republican     | Democrat                | Republican     |
| Mainstream media | .612<br>(.487) | .576<br>(.494) | .464<br>(.316)     | .317<br>(.310) | .570<br>(.279)          | .399<br>(.314) |
| Hyper-Partisan   | .138<br>(.345) | .153<br>(.360) | .209<br>(.269)     | .199<br>(.268) | .379<br>(.339)          | .451<br>(.333) |
| Fake News        | .098<br>(.297) | .099<br>(.299) | .214<br>(.272)     | .184<br>(.257) | .487<br>(.334)          | .478<br>(.342) |

**Table S3.** Average fraction familiar and trust ratings by source type and preferred political party in Study 2. Shown are both trust ratings when considering all data, and when restricting to ratings where the participants indicated being familiar with the source. Standard deviations shown in parentheses.

|                         |                             | Familiarity |      |          | Trust, All Ratings |      |          | Trust, Familiar Ratings |      |          |
|-------------------------|-----------------------------|-------------|------|----------|--------------------|------|----------|-------------------------|------|----------|
|                         |                             | Dem         | Rep  | Combined | Dem                | Rep  | Combined | Dem                     | Rep  | Combined |
| <b>Mainstream Media</b> | pbs.org                     | 0.93        | 0.92 | 0.93     | 0.73               | 0.58 | 0.65     | 0.76                    | 0.60 | 0.68     |
|                         | nytimes.com                 | 0.94        | 0.91 | 0.93     | 0.66               | 0.44 | 0.55     | 0.68                    | 0.46 | 0.57     |
|                         | nbc.com                     | 0.96        | 0.96 | 0.96     | 0.62               | 0.48 | 0.55     | 0.63                    | 0.48 | 0.56     |
|                         | cbs.com                     | 0.94        | 0.95 | 0.95     | 0.61               | 0.49 | 0.55     | 0.62                    | 0.49 | 0.56     |
|                         | washingtonpost.com          | 0.94        | 0.93 | 0.93     | 0.64               | 0.45 | 0.54     | 0.65                    | 0.46 | 0.55     |
|                         | npr.org                     | 0.78        | 0.69 | 0.73     | 0.64               | 0.42 | 0.53     | 0.76                    | 0.54 | 0.65     |
|                         | usatoday.com                | 0.93        | 0.93 | 0.93     | 0.57               | 0.48 | 0.53     | 0.58                    | 0.49 | 0.54     |
|                         | cnn.com                     | 0.98        | 0.96 | 0.97     | 0.63               | 0.42 | 0.53     | 0.63                    | 0.42 | 0.53     |
|                         | msnbc.com                   | 0.94        | 0.94 | 0.94     | 0.59               | 0.40 | 0.50     | 0.60                    | 0.40 | 0.50     |
|                         | huffingtonpost.com          | 0.95        | 0.93 | 0.94     | 0.53               | 0.38 | 0.46     | 0.55                    | 0.39 | 0.47     |
|                         | abc.go.com                  | 0.73        | 0.72 | 0.73     | 0.50               | 0.41 | 0.45     | 0.58                    | 0.49 | 0.53     |
|                         | bloomberg.com               | 0.79        | 0.79 | 0.79     | 0.45               | 0.41 | 0.43     | 0.53                    | 0.47 | 0.50     |
|                         | newsweek.com                | 0.82        | 0.81 | 0.81     | 0.47               | 0.38 | 0.43     | 0.53                    | 0.43 | 0.48     |
|                         | foxnews.com                 | 0.95        | 0.96 | 0.96     | 0.27               | 0.56 | 0.41     | 0.27                    | 0.57 | 0.42     |
|                         | wsj.com                     | 0.59        | 0.49 | 0.54     | 0.44               | 0.34 | 0.39     | 0.64                    | 0.55 | 0.60     |
|                         | economist.com               | 0.64        | 0.46 | 0.55     | 0.43               | 0.31 | 0.37     | 0.56                    | 0.49 | 0.52     |
|                         | fortune.com                 | 0.63        | 0.55 | 0.59     | 0.40               | 0.33 | 0.37     | 0.52                    | 0.45 | 0.49     |
|                         | theguardian.com             | 0.78        | 0.59 | 0.69     | 0.41               | 0.26 | 0.34     | 0.48                    | 0.35 | 0.42     |
|                         | politico.com                | 0.59        | 0.46 | 0.53     | 0.36               | 0.22 | 0.29     | 0.51                    | 0.34 | 0.42     |
|                         | salon.com                   | 0.41        | 0.25 | 0.33     | 0.25               | 0.13 | 0.19     | 0.45                    | 0.23 | 0.34     |
| <b>Hyper-Partisan</b>   | dailywire.com               | 0.48        | 0.55 | 0.52     | 0.18               | 0.21 | 0.20     | 0.23                    | 0.29 | 0.26     |
|                         | breitbart.com               | 0.57        | 0.50 | 0.53     | 0.11               | 0.22 | 0.17     | 0.09                    | 0.34 | 0.22     |
|                         | thefederalistpapers.org     | 0.21        | 0.27 | 0.24     | 0.12               | 0.19 | 0.16     | 0.21                    | 0.38 | 0.30     |
|                         | infowars.com                | 0.48        | 0.42 | 0.45     | 0.11               | 0.19 | 0.15     | 0.12                    | 0.29 | 0.20     |
|                         | conservativetribune.com     | 0.09        | 0.13 | 0.11     | 0.09               | 0.21 | 0.15     | 0.17                    | 0.46 | 0.31     |
|                         | dailykos.com                | 0.25        | 0.16 | 0.20     | 0.17               | 0.12 | 0.14     | 0.33                    | 0.19 | 0.26     |
|                         | bipartisanreport.com        | 0.12        | 0.09 | 0.10     | 0.14               | 0.15 | 0.14     | 0.31                    | 0.31 | 0.31     |
|                         | dailycaller.com             | 0.19        | 0.24 | 0.21     | 0.11               | 0.17 | 0.14     | 0.19                    | 0.36 | 0.27     |
|                         | dailynewsbin.com            | 0.10        | 0.12 | 0.11     | 0.12               | 0.14 | 0.13     | 0.32                    | 0.35 | 0.33     |
|                         | newcenturytimes.com         | 0.06        | 0.08 | 0.07     | 0.12               | 0.14 | 0.13     | 0.29                    | 0.38 | 0.33     |
|                         | rightwingnews.com           | 0.08        | 0.14 | 0.11     | 0.08               | 0.17 | 0.12     | 0.16                    | 0.38 | 0.27     |
|                         | ahtribune.com               | 0.03        | 0.04 | 0.04     | 0.10               | 0.14 | 0.12     | 0.24                    | 0.48 | 0.36     |
|                         | trueactivist.com            | 0.06        | 0.07 | 0.06     | 0.11               | 0.13 | 0.12     | 0.31                    | 0.27 | 0.29     |
|                         | palmerreport.com            | 0.08        | 0.05 | 0.07     | 0.11               | 0.12 | 0.12     | 0.30                    | 0.26 | 0.28     |
|                         | youngcons.com               | 0.06        | 0.09 | 0.07     | 0.09               | 0.14 | 0.11     | 0.24                    | 0.33 | 0.28     |
|                         | usuncut.com                 | 0.06        | 0.05 | 0.05     | 0.10               | 0.12 | 0.11     | 0.25                    | 0.25 | 0.25     |
|                         | chicksontheright.com        | 0.05        | 0.12 | 0.08     | 0.07               | 0.15 | 0.11     | 0.18                    | 0.40 | 0.29     |
|                         | commondreams.org            | 0.06        | 0.04 | 0.05     | 0.11               | 0.12 | 0.12     | 0.38                    | 0.33 | 0.35     |
|                         | regated.com                 | 0.02        | 0.03 | 0.02     | 0.10               | 0.12 | 0.11     | 0.41                    | 0.35 | 0.38     |
|                         | pamelageller.com            | 0.03        | 0.04 | 0.03     | 0.09               | 0.12 | 0.10     | 0.29                    | 0.38 | 0.34     |
| heatst.com              | 0.04                        | 0.06        | 0.05 | 0.09     | 0.11               | 0.10 | 0.31     | 0.29                    | 0.30 |          |
| redflagnews.com         | 0.04                        | 0.04        | 0.04 | 0.08     | 0.11               | 0.10 | 0.35     | 0.19                    | 0.27 |          |
| <b>Fake News</b>        | worldnewsdailyreport.com    | 0.33        | 0.43 | 0.38     | 0.18               | 0.21 | 0.20     | 0.31                    | 0.31 | 0.31     |
|                         | thenewyorkevening.com       | 0.11        | 0.08 | 0.10     | 0.16               | 0.16 | 0.16     | 0.45                    | 0.44 | 0.44     |
|                         | americannews.com            | 0.10        | 0.14 | 0.12     | 0.13               | 0.17 | 0.15     | 0.41                    | 0.34 | 0.37     |
|                         | conservativedailyreport.com | 0.09        | 0.18 | 0.14     | 0.09               | 0.21 | 0.15     | 0.16                    | 0.41 | 0.29     |
|                         | news4ktna.com               | 0.08        | 0.09 | 0.08     | 0.14               | 0.15 | 0.15     | 0.50                    | 0.46 | 0.48     |
|                         | dailyheadlines.net          | 0.11        | 0.17 | 0.14     | 0.13               | 0.15 | 0.14     | 0.35                    | 0.32 | 0.33     |
|                         | usasupreme.com              | 0.05        | 0.06 | 0.05     | 0.11               | 0.16 | 0.14     | 0.37                    | 0.45 | 0.41     |
|                         | globalrealnews.com          | 0.09        | 0.10 | 0.10     | 0.12               | 0.15 | 0.14     | 0.34                    | 0.37 | 0.35     |
|                         | uspoliticsinfo.com          | 0.09        | 0.11 | 0.10     | 0.12               | 0.15 | 0.14     | 0.30                    | 0.33 | 0.31     |
|                         | now8news.com                | 0.04        | 0.06 | 0.05     | 0.12               | 0.15 | 0.13     | 0.42                    | 0.46 | 0.44     |
|                         | freedomdaily.com            | 0.09        | 0.12 | 0.10     | 0.11               | 0.15 | 0.13     | 0.29                    | 0.26 | 0.27     |
|                         | newsexaminer.net            | 0.08        | 0.11 | 0.09     | 0.11               | 0.14 | 0.13     | 0.28                    | 0.28 | 0.28     |
|                         | civictribune.com            | 0.04        | 0.06 | 0.05     | 0.12               | 0.14 | 0.13     | 0.29                    | 0.36 | 0.33     |
|                         | empireherald.com            | 0.07        | 0.07 | 0.07     | 0.11               | 0.14 | 0.12     | 0.33                    | 0.33 | 0.33     |
|                         | thelastlineofdefense.org    | 0.04        | 0.05 | 0.05     | 0.09               | 0.13 | 0.11     | 0.31                    | 0.31 | 0.31     |
|                         | react365.com                | 0.05        | 0.05 | 0.05     | 0.09               | 0.12 | 0.11     | 0.29                    | 0.26 | 0.28     |
|                         | theracketreport.com         | 0.05        | 0.06 | 0.06     | 0.10               | 0.11 | 0.10     | 0.33                    | 0.24 | 0.28     |
| notallowedto.com        | 0.02                        | 0.02        | 0.02 | 0.09     | 0.11               | 0.10 | 0.37     | 0.11                    | 0.24 |          |

*Table S4. Fraction familiar and average trust ratings for each source in Study 1. Websites are sorted within each category by combined all-data trust ratings.*

|                         |                          | Familiarity |      |          | Trust, All Ratings |      |          | Trust, Familiar Ratings |      |          | Fact-checker ratings |
|-------------------------|--------------------------|-------------|------|----------|--------------------|------|----------|-------------------------|------|----------|----------------------|
|                         |                          | Dem         | Rep  | Combined | Dem                | Rep  | Combined | Dem                     | Rep  | Combined |                      |
| <b>Mainstream Media</b> | cbsnews.com              | 0.77        | 0.77 | 0.77     | 0.57               | 0.38 | 0.48     | 0.62                    | 0.42 | 0.52     | 0.66                 |
|                         | cnn.com                  | 0.84        | 0.83 | 0.83     | 0.60               | 0.34 | 0.47     | 0.65                    | 0.36 | 0.50     | 0.84                 |
|                         | usatoday.com             | 0.77        | 0.76 | 0.77     | 0.52               | 0.39 | 0.45     | 0.58                    | 0.43 | 0.51     | 0.66                 |
|                         | abcnews.go.com           | 0.68        | 0.60 | 0.64     | 0.55               | 0.35 | 0.45     | 0.61                    | 0.42 | 0.52     | 0.56                 |
|                         | washingtonpost.com       | 0.77        | 0.75 | 0.76     | 0.56               | 0.33 | 0.45     | 0.63                    | 0.36 | 0.50     | 0.91                 |
|                         | nytimes.com              | 0.73        | 0.67 | 0.70     | 0.57               | 0.32 | 0.45     | 0.66                    | 0.36 | 0.51     | 0.91                 |
|                         | foxnews.com              | 0.85        | 0.86 | 0.86     | 0.34               | 0.55 | 0.45     | 0.36                    | 0.59 | 0.47     | 0.44                 |
|                         | msnbc.com                | 0.81        | 0.77 | 0.79     | 0.56               | 0.31 | 0.44     | 0.61                    | 0.34 | 0.48     | 0.66                 |
|                         | huffingtonpost.com       | 0.76        | 0.76 | 0.76     | 0.50               | 0.32 | 0.41     | 0.58                    | 0.35 | 0.47     | 0.47                 |
|                         | news.yahoo.com           | 0.68        | 0.66 | 0.67     | 0.47               | 0.34 | 0.40     | 0.53                    | 0.41 | 0.47     | 0.59                 |
|                         | chicagotribune.com       | 0.60        | 0.53 | 0.57     | 0.47               | 0.29 | 0.38     | 0.56                    | 0.35 | 0.46     | 0.53                 |
|                         | bbc.co.uk                | 0.50        | 0.42 | 0.46     | 0.46               | 0.30 | 0.38     | 0.65                    | 0.44 | 0.54     | 0.81                 |
|                         | nypost.com               | 0.60        | 0.55 | 0.58     | 0.45               | 0.30 | 0.38     | 0.53                    | 0.37 | 0.45     | 0.38                 |
|                         | aol.com/news             | 0.56        | 0.52 | 0.54     | 0.40               | 0.29 | 0.35     | 0.48                    | 0.37 | 0.43     | 0.41                 |
|                         | wsj.com                  | 0.34        | 0.33 | 0.33     | 0.37               | 0.30 | 0.34     | 0.65                    | 0.55 | 0.60     | 0.72                 |
|                         | nydailynews.com          | 0.47        | 0.41 | 0.44     | 0.40               | 0.26 | 0.33     | 0.48                    | 0.35 | 0.42     | 0.34                 |
|                         | bostonglobe.com          | 0.38        | 0.35 | 0.37     | 0.40               | 0.27 | 0.33     | 0.59                    | 0.38 | 0.48     | 0.75                 |
| latimes.com             | 0.47                     | 0.38        | 0.42 | 0.43     | 0.22               | 0.33 | 0.58     | 0.33                    | 0.46 | 0.75     |                      |
| dailymail.co.uk         | 0.45                     | 0.40        | 0.43 | 0.34     | 0.25               | 0.30 | 0.46     | 0.38                    | 0.42 | 0.44     |                      |
| sfchronicle.com         | 0.21                     | 0.19        | 0.20 | 0.32     | 0.20               | 0.26 | 0.58     | 0.35                    | 0.46 | 0.59     |                      |
| <b>Hyper-Partisan</b>   | dailywire.com            | 0.36        | 0.35 | 0.35     | 0.27               | 0.22 | 0.25     | 0.38                    | 0.33 | 0.35     | 0.16                 |
|                         | conservativetribune.com  | 0.10        | 0.15 | 0.13     | 0.20               | 0.27 | 0.24     | 0.46                    | 0.56 | 0.51     | 0.03                 |
|                         | newsmax.com              | 0.15        | 0.23 | 0.19     | 0.22               | 0.24 | 0.23     | 0.40                    | 0.48 | 0.44     | 0.13                 |
|                         | thepoliticalinsider.com  | 0.22        | 0.24 | 0.23     | 0.24               | 0.21 | 0.22     | 0.40                    | 0.38 | 0.39     | 0.03                 |
|                         | breitbart.com            | 0.35        | 0.41 | 0.38     | 0.18               | 0.27 | 0.22     | 0.16                    | 0.42 | 0.29     | 0.16                 |
|                         | westernjournal.com       | 0.12        | 0.13 | 0.13     | 0.23               | 0.21 | 0.22     | 0.48                    | 0.50 | 0.49     | 0.06                 |
|                         | dailycaller.com          | 0.13        | 0.18 | 0.16     | 0.22               | 0.21 | 0.21     | 0.35                    | 0.47 | 0.41     | 0.13                 |
|                         | infowars.com             | 0.29        | 0.28 | 0.28     | 0.20               | 0.21 | 0.21     | 0.24                    | 0.39 | 0.31     | 0.03                 |
|                         | patriotpost.us           | 0.10        | 0.13 | 0.11     | 0.19               | 0.22 | 0.21     | 0.39                    | 0.45 | 0.42     | 0                    |
|                         | dailysignal.com          | 0.11        | 0.10 | 0.11     | 0.22               | 0.18 | 0.20     | 0.49                    | 0.38 | 0.43     | 0                    |
|                         | dailykos.com             | 0.16        | 0.11 | 0.13     | 0.23               | 0.17 | 0.20     | 0.48                    | 0.41 | 0.44     | 0.16                 |
|                         | activepost.com           | 0.08        | 0.09 | 0.09     | 0.21               | 0.18 | 0.20     | 0.45                    | 0.55 | 0.50     | 0                    |
|                         | redstate.com             | 0.09        | 0.13 | 0.11     | 0.19               | 0.21 | 0.20     | 0.39                    | 0.54 | 0.46     | 0.06                 |
|                         | rawstory.com             | 0.10        | 0.08 | 0.09     | 0.21               | 0.17 | 0.19     | 0.43                    | 0.53 | 0.48     | 0.09                 |
|                         | ijr.com                  | 0.05        | 0.09 | 0.07     | 0.20               | 0.17 | 0.19     | 0.56                    | 0.54 | 0.55     | 0.09                 |
|                         | thedailysheep.com        | 0.08        | 0.08 | 0.08     | 0.20               | 0.17 | 0.18     | 0.48                    | 0.48 | 0.48     | 0.09                 |
|                         | antiwar.com              | 0.07        | 0.07 | 0.07     | 0.20               | 0.16 | 0.18     | 0.49                    | 0.59 | 0.54     | 0                    |
| blacklistednews.com     | 0.09                     | 0.07        | 0.08 | 0.20     | 0.17               | 0.18 | 0.47     | 0.53                    | 0.50 | 0        |                      |
| commondreams.org        | 0.06                     | 0.07        | 0.07 | 0.20     | 0.16               | 0.18 | 0.55     | 0.58                    | 0.57 | 0.03     |                      |
| crooksandliars.com      | 0.07                     | 0.06        | 0.06 | 0.19     | 0.17               | 0.18 | 0.53     | 0.58                    | 0.56 | 0.13     |                      |
| <b>Fake News</b>        | channel24news.com        | 0.17        | 0.13 | 0.15     | 0.28               | 0.21 | 0.25     | 0.54                    | 0.48 | 0.51     | 0.06                 |
|                         | dailybuzzlive.com        | 0.30        | 0.27 | 0.28     | 0.28               | 0.21 | 0.24     | 0.43                    | 0.36 | 0.39     | 0                    |
|                         | thenewyorkevening.com    | 0.11        | 0.10 | 0.11     | 0.28               | 0.20 | 0.24     | 0.58                    | 0.49 | 0.54     | 0                    |
|                         | conservativedaily.com    | 0.12        | 0.20 | 0.16     | 0.20               | 0.25 | 0.23     | 0.43                    | 0.47 | 0.45     | 0                    |
|                         | americannews.com         | 0.15        | 0.13 | 0.14     | 0.24               | 0.20 | 0.22     | 0.43                    | 0.43 | 0.43     | 0                    |
|                         | realnewsrightnow.com     | 0.09        | 0.10 | 0.09     | 0.22               | 0.19 | 0.21     | 0.45                    | 0.46 | 0.45     | 0                    |
|                         | freedomdaily.com         | 0.12        | 0.13 | 0.13     | 0.22               | 0.19 | 0.20     | 0.41                    | 0.42 | 0.41     | 0.03                 |
|                         | now8news.com             | 0.09        | 0.08 | 0.08     | 0.22               | 0.18 | 0.20     | 0.57                    | 0.53 | 0.55     | 0                    |
|                         | newsbreakhere.com        | 0.08        | 0.08 | 0.08     | 0.21               | 0.18 | 0.19     | 0.49                    | 0.56 | 0.53     | 0                    |
|                         | beforeitsnews.com        | 0.07        | 0.07 | 0.07     | 0.20               | 0.19 | 0.19     | 0.53                    | 0.55 | 0.54     | 0                    |
|                         | yournewswire.com         | 0.09        | 0.09 | 0.09     | 0.21               | 0.17 | 0.19     | 0.45                    | 0.45 | 0.45     | 0.06                 |
|                         | onpoliticalplaza.com     | 0.07        | 0.09 | 0.08     | 0.20               | 0.18 | 0.19     | 0.49                    | 0.57 | 0.53     | 0                    |
|                         | whatdoesitmean.com       | 0.07        | 0.07 | 0.07     | 0.20               | 0.18 | 0.19     | 0.51                    | 0.56 | 0.54     | 0                    |
|                         | downtrend.com            | 0.06        | 0.08 | 0.07     | 0.20               | 0.17 | 0.19     | 0.54                    | 0.51 | 0.53     | 0                    |
|                         | socialeverything.com     | 0.07        | 0.06 | 0.07     | 0.20               | 0.16 | 0.18     | 0.55                    | 0.59 | 0.57     | 0                    |
|                         | angrypatriotmovement.com | 0.07        | 0.08 | 0.07     | 0.17               | 0.19 | 0.18     | 0.51                    | 0.51 | 0.51     | 0                    |
|                         | bb4sp.com                | 0.06        | 0.06 | 0.06     | 0.19               | 0.16 | 0.18     | 0.55                    | 0.49 | 0.52     | 0                    |
| clashdaily.com          | 0.07                     | 0.07        | 0.07 | 0.20     | 0.15               | 0.18 | 0.46     | 0.42                    | 0.44 | 0        |                      |
| react365.com            | 0.06                     | 0.07        | 0.06 | 0.18     | 0.16               | 0.17 | 0.48     | 0.55                    | 0.52 | 0        |                      |
| notallowedto.com        | 0.04                     | 0.05        | 0.05 | 0.18     | 0.16               | 0.17 | 0.61     | 0.60                    | 0.60 | 0        |                      |

*Table S5. Fraction familiar and average trust ratings for each source in Study 2 and (last column) for professional fact-checkers.*

### 3. Robustness across subgroups

Here we demonstrate that our key results are robust across various subgroups within our data. First, we restrict to the only most ideological participants in our sample – those who indicated the maximum or minimum values on both the social conservatism scale and economic conservatism scale (S1: N=102 maximal liberals, N=49 maximal conservatives; S2: N=83 maximal liberals, N=114 maximal conservatives). Figure S1 shows the average trust given to each source by maximal liberals and maximal conservatives in each study.

As expected, the ideological differences in trust ratings are qualitatively similar but larger in magnitude compared to what was described in main text. In Study 1, extreme liberals trusted mainstream media outlets 18.0 percentage points more than extreme conservatives,  $F(1,150)=32.38$ ,  $p<.0001$ , extreme conservatives trusted hyper-partisan sites 9.7 percentage points more than extreme liberals,  $F(1,150)=10.18$ ,  $p=.002$ , and extreme conservatives trusted fake news sites 9.6 percentage points more than extreme liberals,  $F(1,150)=8.82$ ,  $p=.004$ . In Study 2, liberals trusted mainstream media outlets 18.6 percentage points more than conservatives,  $F(1,196)=28.02$ ,  $p<.0001$ , and there was no significant difference between extreme conservatives and extreme liberals in trust of hyper-partisan sites (3.0 percentage points,  $F(1,196)=0.62$ ,  $p=.43$ ) or fake news sites (0.0 percentage points,  $F(1,196)=0.00$ ,  $p=1.00$ ).

Despite these more exaggerated ideological differences, however, it remains true that among both extreme liberals and extreme conservatives, mainstream media sources receive much higher average trust scores than either hyper-partisan sites or fake news sites (S1:  $F(1,150)>30$ ,  $p<.0001$  for all comparisons; S2:  $F(1,196)>10$ ,  $p<.002$  for all comparisons). Furthermore, when calculating a politically balanced trust rating for each outlet by weighting extreme liberal and extreme conservative participants equally, every single mainstream media outlet receives a higher trust score than every single hyper-partisan or fake news site (except for the San Francisco Chronicle in Study 2). Thus, crowd-sourced trust ratings are effective even among highly partisan individuals.

Next, we turn to demographics. In Figures S3 and S4, we show average trust ratings sub-setting on gender and age. The pattern is similar in all cases, with mainstream sources receiving much higher ratings than hyper-partisan or fake news sites.

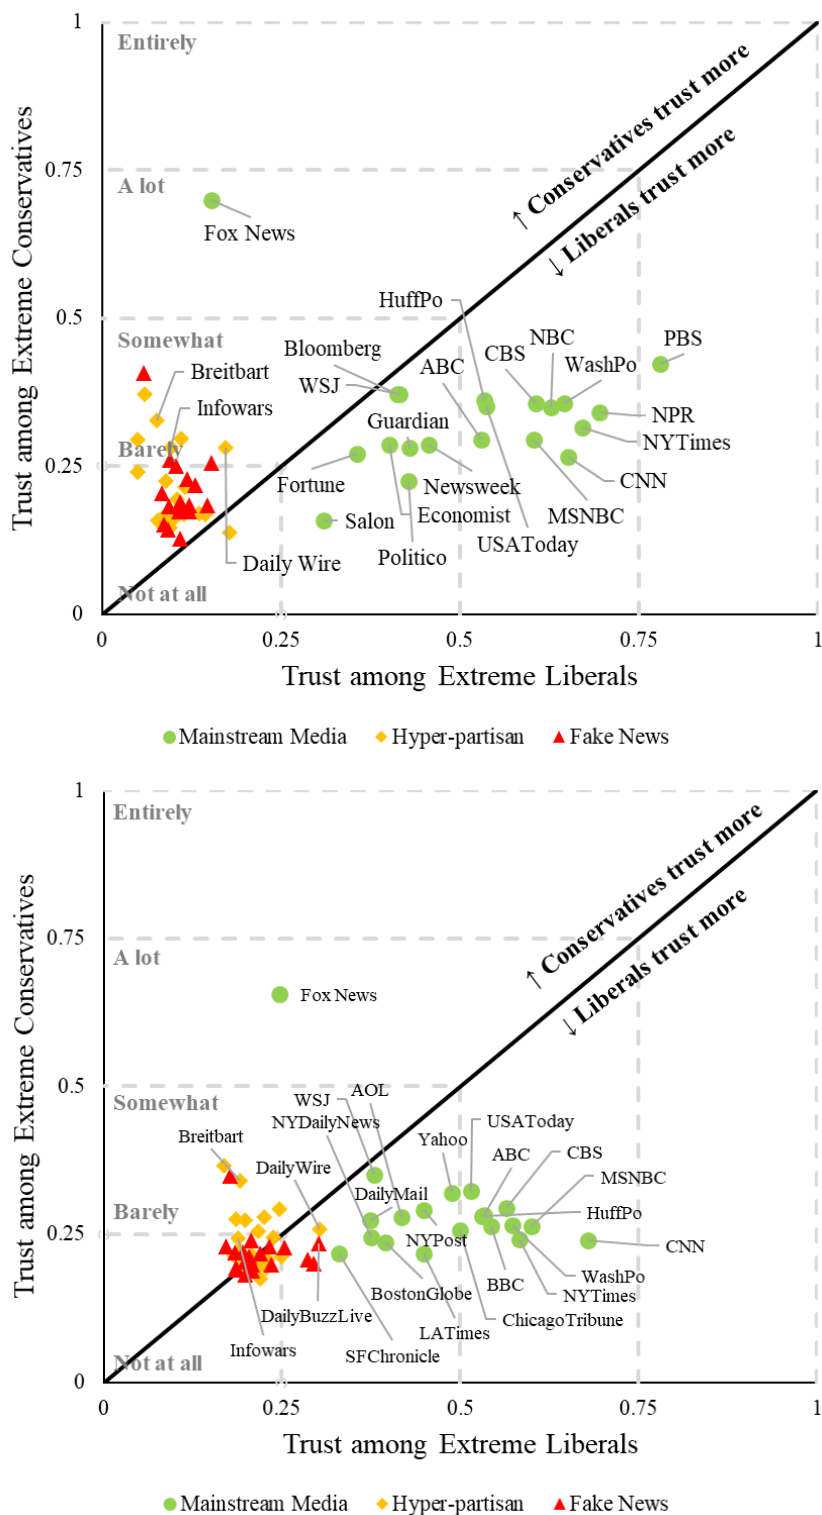

**Figure S1.** Average trust ratings for each source among maximal liberals and maximal conservatives in Study 1 (A) and Study 2 (B).

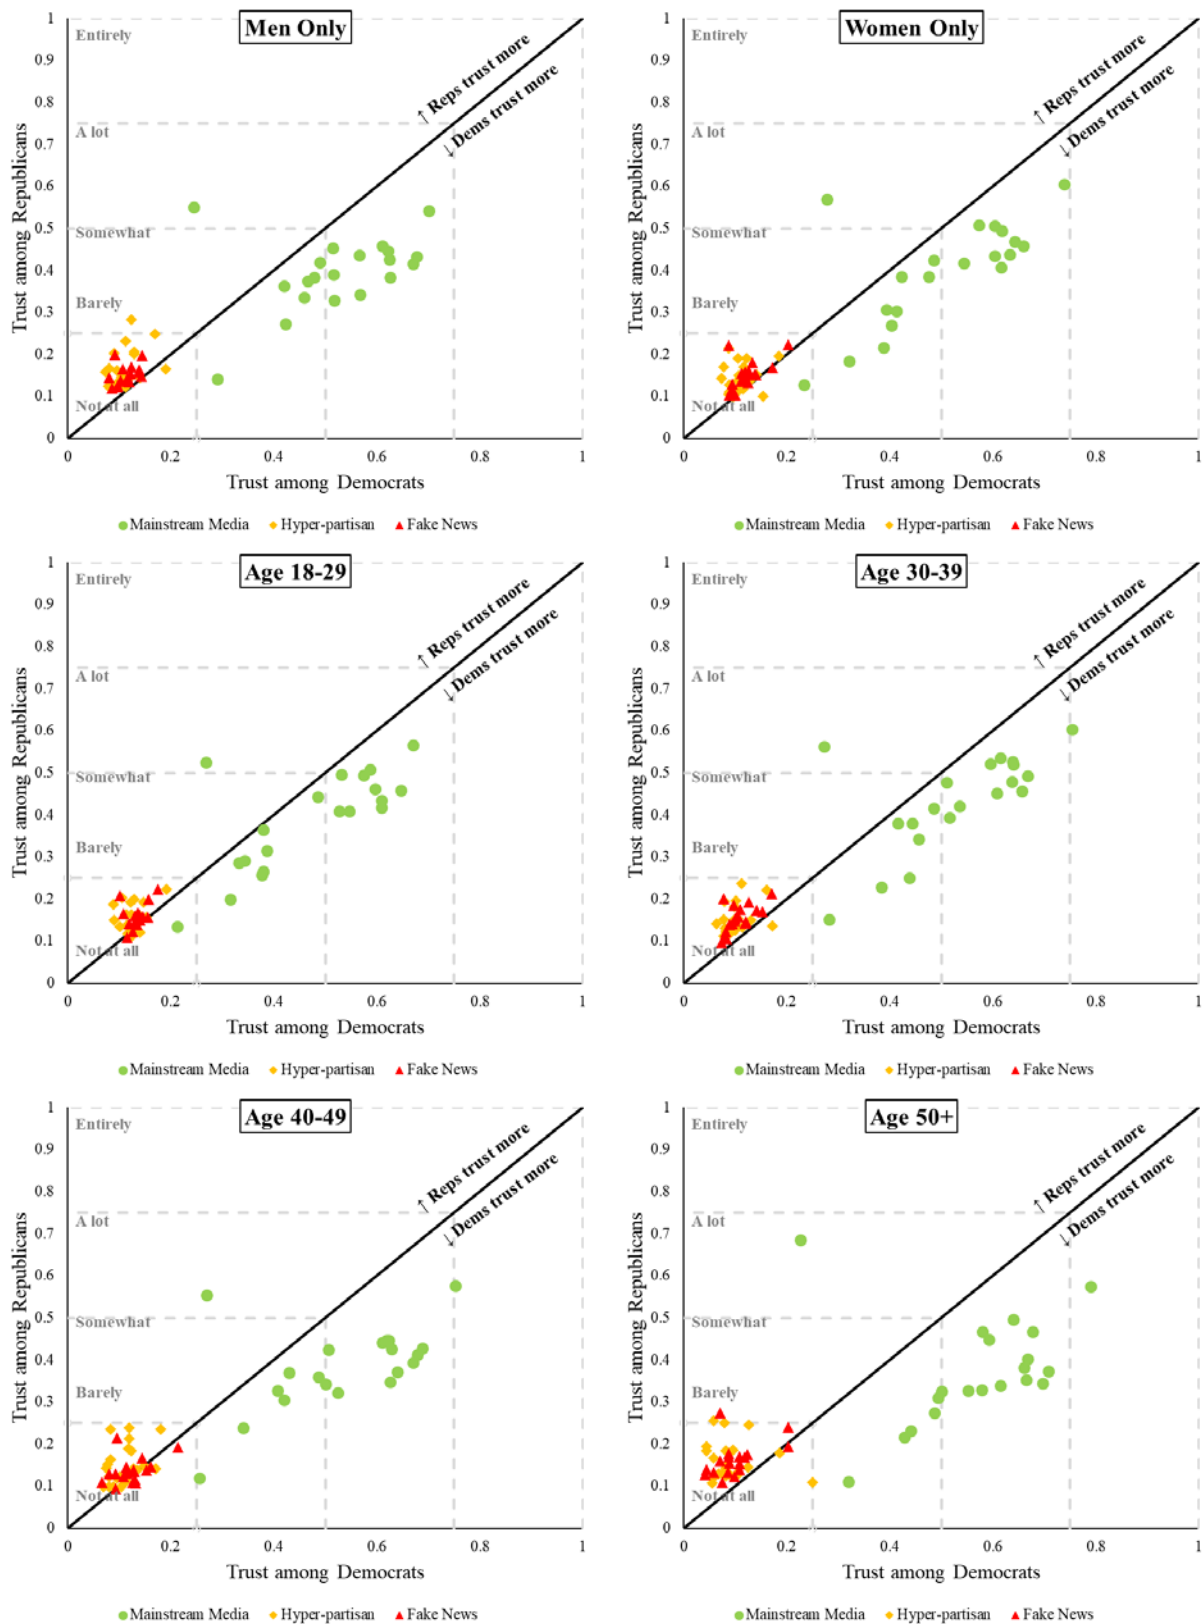

**Figure S2.** Average trust ratings for each source among Democrats and Republicans in Study 1, separating based on gender and age.



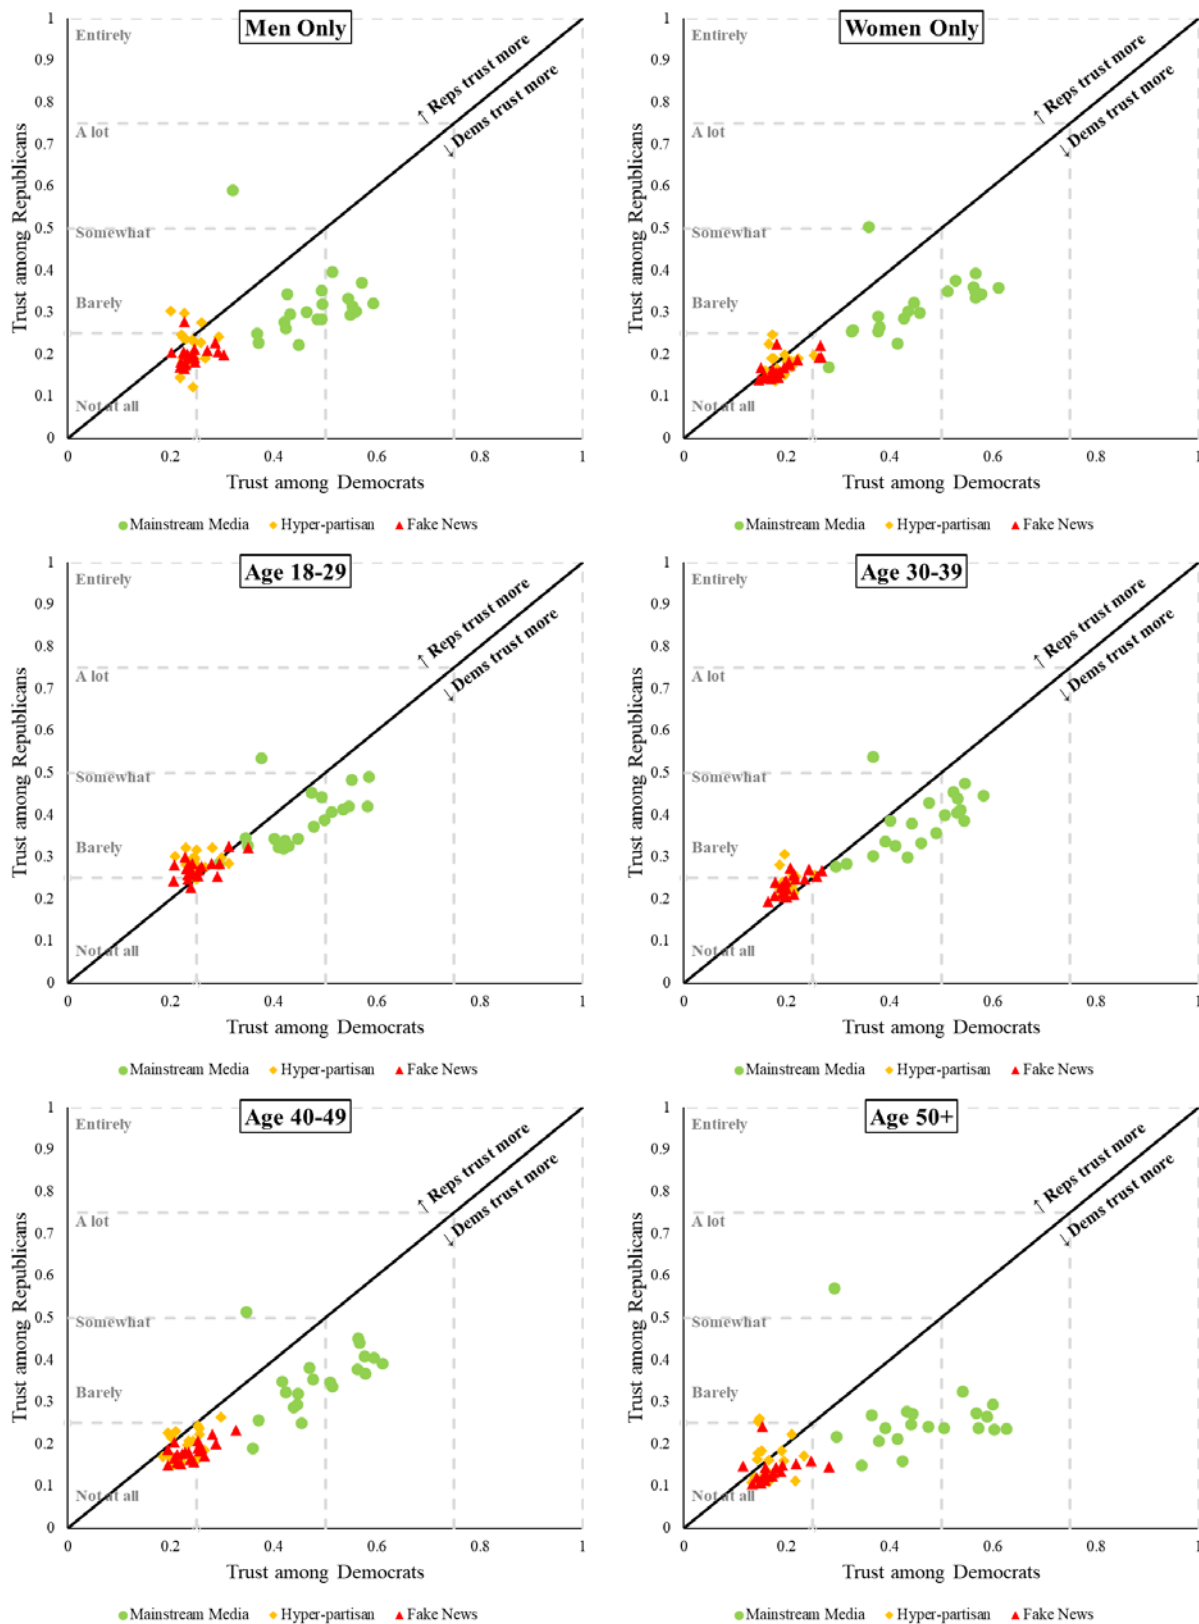

**Figure S3.** Average trust ratings for each source among Democrats and Republicans in Study 2, separating based on gender and age.

#### 4. Participant-level analysis of relationship with fact-checker ratings

In the main text, we report item-level correlations between the ratings of participants and professional fact-checkers. Here we report the version of this analysis we pre-registered, which is conducted at the level of the trust rating (i.e. 60 observations per participant) using linear regression with robust standard errors clustered on participant, taking professional fact-checker rating and participant partisanship (dummy for Republican) as the independent variables. We reported the item-level analysis in the main text because, even though the results are essentially identical, in retrospect we concluded that the item-level results were easier to interpret.

As with the item-level correlations, we find significant positive relationships between the professional fact-checker ratings and the ratings of Democratic participants,  $b = .405$ ,  $F(1,970) = 728.51$ ,  $p < .0001$ , as well as between the professional fact-checker ratings and the ratings of Republican participants,  $b = .188$ ,  $F(1,970) = 204.86$ ,  $p < .0001$ . Furthermore, there was a significant negative interaction between the Republican dummy and the fact-checker rating,  $b = -.217$ ,  $F(1,970) = 118.18$ ,  $p < .0001$ , indicating that the relationship with professional fact-checker scores was significantly stronger for Democratic participants than for Republican participants.

## 5. Cognitive reflection and media source discernment

Here we report the results of *post hoc* regressions predicting media source discernment, which is calculated by converting trust ratings for mainstream sources to a  $z$ -score and subtracting it from the  $z$ -scored mean trustworthiness ratings of hyper-partisan and fake news. As independent variables we include performance on the Cognitive Reflection Test (CRT) and political ideology (average of a 5-point social conservative item and a 5-point economic conservative item). We also examine the interaction between these two terms, and the impact of controlling for age, gender, education (categorical across 8 different education levels) and – in Study 2, where this data was available – ethnicity (by including dummy variables coding for black, Hispanic, and other). Regression results are shown in Tables S6 and S7. As can be seen, the results reported in the main text are robust to the inclusion of demographic controls.

| Study 1: MTurk     | (1)       | (2)       | (3)       | (4)       |
|--------------------|-----------|-----------|-----------|-----------|
| CRT                | 0.162***  | 0.123***  | 0.316***  | 0.294***  |
| Conservatism       | -0.342*** | -0.328*** | -0.283*** | -0.263*** |
| CRT x Conservatism |           |           | -0.172*   | -0.191*   |
| Age                |           | 0.017     |           | 0.023     |
| Female             |           | 0.013     |           | 0.012     |
| Education dummies  | No        | Yes       | No        | Yes       |
| $R^2$              | 0.15      | 0.19      | 0.15      | 0.19      |
| $N$                | 1,001     | 996       | 1,001     | 996       |

**Table S6.** Regression results predicting media source discernment in Study 1. Standardized coefficients (betas) are shown. \*  $p < 0.05$ ; \*\*  $p < 0.01$ ; \*\*\*  $p < 0.001$

| Study 2: Lucid     | (1)       | (2)       | (3)       | (4)       |
|--------------------|-----------|-----------|-----------|-----------|
| CRT                | 0.151***  | 0.127***  | 0.362***  | 0.313***  |
| Conservatism       | -0.283*** | -0.306*** | -0.190*** | -0.225*** |
| CRT x Conservatism |           |           | -0.246**  | -0.215*   |
| Age                |           | 0.082*    |           | 0.084*    |
| Female             |           | 0.105***  |           | 0.103***  |
| Ethnicity:Black    |           | -0.027    |           | -0.025    |
| Ethnicity:Hispanic |           | 0.021     |           | 0.025     |
| Ethnicity:Other    |           | -0.061*   |           | -0.063*   |
| Education dummies  | No        | Yes       | No        | Yes       |
| $R^2$              | 0.10      | 0.18      | 0.11      | 0.18      |
| $N$                | 968       | 941       | 968       | 941       |

**Table S7.** Regression results predicting media source discernment in Study 2. Standardized coefficients (betas) are shown. \*  $p < 0.05$ ; \*\*  $p < 0.01$ ; \*\*\*  $p < 0.001$

## 6. The relationship between familiarity and trust

In the main text, we showed that trust ratings of laypeople effectively differentiate between mainstream sources and hyper-partisan or fake news sources, despite the fact that most participants were not familiar with most of the hyper-partisan or fake news sites. Here, we examine the role of familiarity in more detail.

We begin by observing that the crowdsourced trust ratings performed more much poorly when excluding trust ratings for which the participant indicated being unfamiliar with the website being rated (Figure S4). This exclusion dramatically increases the trust ratings of hyper-partisan websites and fake websites (trust ratings are more than twice as high when excluding unfamiliar ratings; see Tables S2 and S3), but produces a much smaller increase in trust ratings for mainstream media outlets (trust is 10% to 25% higher when excluding unfamiliar ratings). As a result, excluding unfamiliar ratings substantially reduces the difference in perceived trust between mainstream media outlets and both hyper-partisan and fake news sites.

From a practical perspective, these data indicate the dangers of filtering on experience: crowd-sourced ratings of outlet trustworthiness do *not* do a particularly good job of differentiating between reputable and non-reputable sources if the ratings of unfamiliar participants are excluded.

These observations also shed light on the cognitive basis of media trust judgments. In particular, they allow us to identify participants' baseline trust attitudes in the absence of information. Are people *initially agnostic*, such that without prior knowledge about a given source they are agnostic as to its reliability – and then as they accumulate information in the form of exposure to content from the outlet, they update their opinion about the outlet's trustworthiness to be more positive or negative, depending on their assessment of the observed content? Are they *initially skeptical*, such that participants without prior knowledge about a given source typically assume that the source is unreliable, and sources are then able to earn a trust by producing content that is deemed to be reliable? Or are they *initially trusting*, such that participants without prior knowledge about a given source typically assume that the source is reliable, but sources are then able to lose trust by producing content that is deemed to be unreliable?

Our data clearly differentiate between these accounts. In particular, they are uniquely consistent with the initially skeptical account of trust in media, whereby people trust an outlet only after becoming familiar with the coverage that outlet produces (and judging that coverage to be trustworthy). This is demonstrated by an examination of the relationship between familiarity and trust at both the level of individual ratings (Figure S4) and sources (Figure S5). As can be seen in Figure S4, ratings of unfamiliar outlets are heavily skewed towards distrust – indicating that lack of familiarity is associated with distrust, rather than indifference (as per the initially agnostic account) or trust (as per the initially trusting account). Furthermore, while Figure S5 shows a clear strong positive relationship between familiarity and trust, we see no outlets that received high trust scores despite being unfamiliar to most participants. Conversely, there are several outlets which had comparatively high levels of familiarity but low levels of trust (e.g. Breitbart and Infowars among Democrats). This pattern supports the initially skeptical account whereby in the absence of familiarity, participants typically assume an outlet is untrustworthy.

Importantly, these results also speak against a simpler account of the relationship between familiarity and trust, whereby familiarity necessarily leads to increased trust. A long tradition in cognitive science has demonstrated such “illusory truth effects” in the context of specific statements, whereby merely reading a statement (and thus becoming familiar with it) makes the statement seem more true on subsequent encounters (1, 2). This effect has been shown to extend to highly implausible partisan fake news, even when the headlines do not align with one’s ideology (3). However, the data in Figure S6 suggest that this mechanism is *not* operating at the level of sources (rather than individual statements). In particular, the fact that Breitbart and Infowars are much more familiar than other hyper-partisan sources for Democrats, but are not trusted more than other hyper-partisan sources, indicates that familiar does not directly lead to increased trust. Instead, our results suggest that familiarity is necessary *but not sufficient* for increased trust. Nonetheless, it is worth noting that to the extent that familiarity opens the door to increased trust, unreliable sites that manage to gain notoriety may also gain some degree of increased trust (particularly amongst those who are ideologically aligned). Such an effect work against the effectiveness of the crowdsourcing approach.

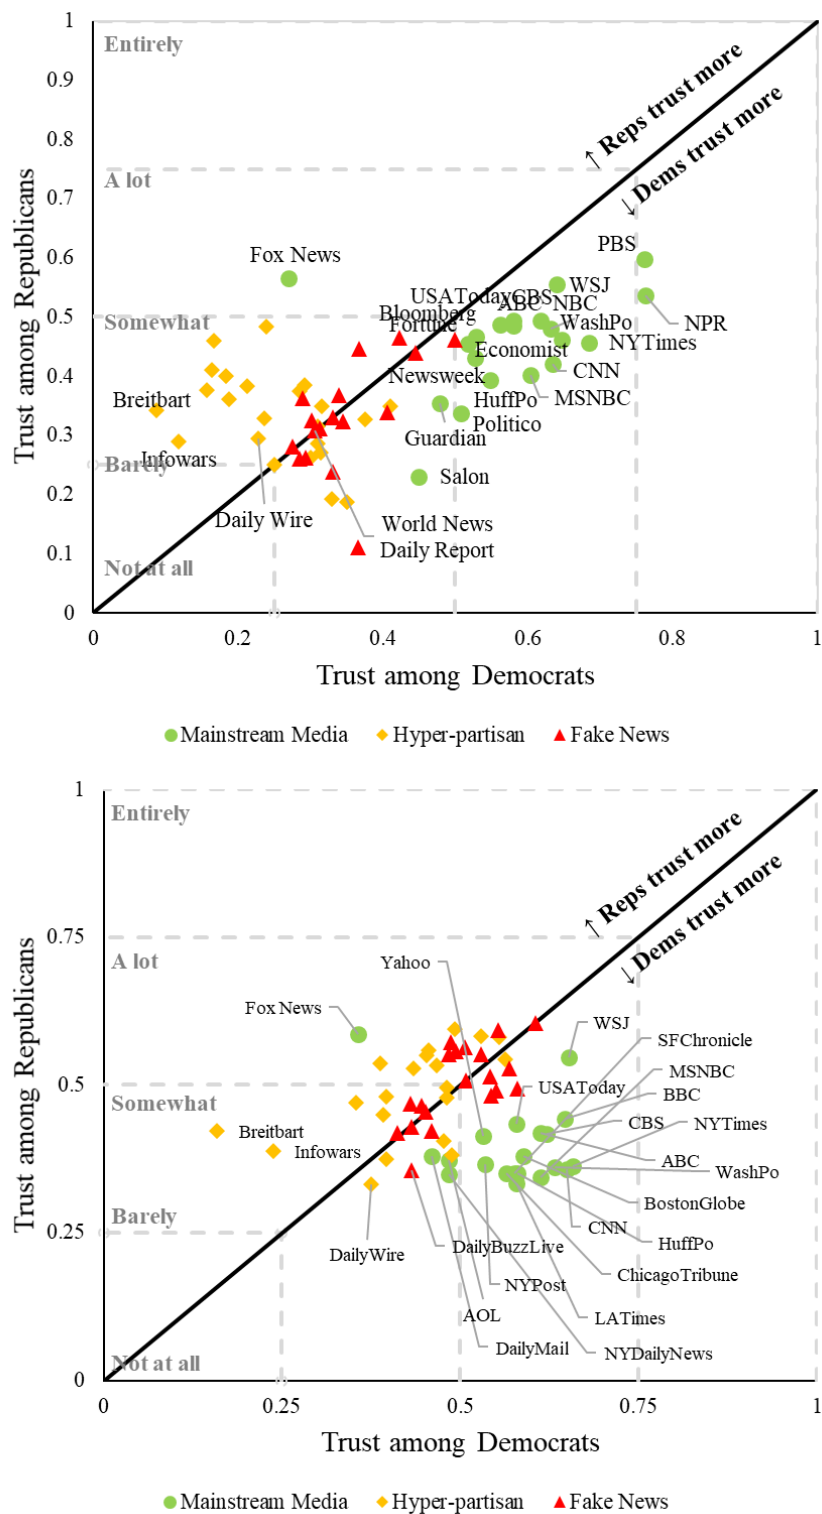

**Figure S4.** Average trust ratings for each source when restricting to familiarity ratings, in Study 1 (A) and Study 2 (B).

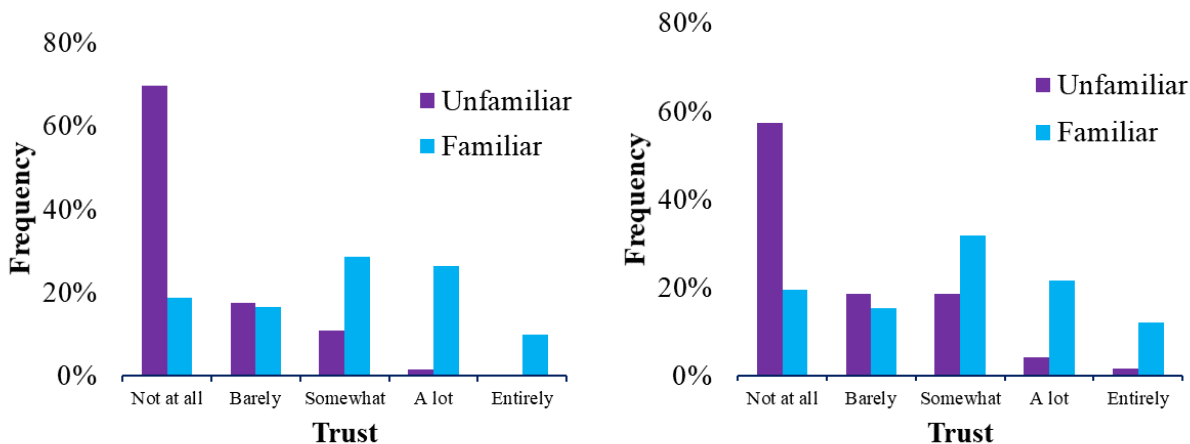

Figure S5. Distribution of individual trust ratings for unfamiliar versus familiar sources in Study 1 (A) and Study 2 (B).

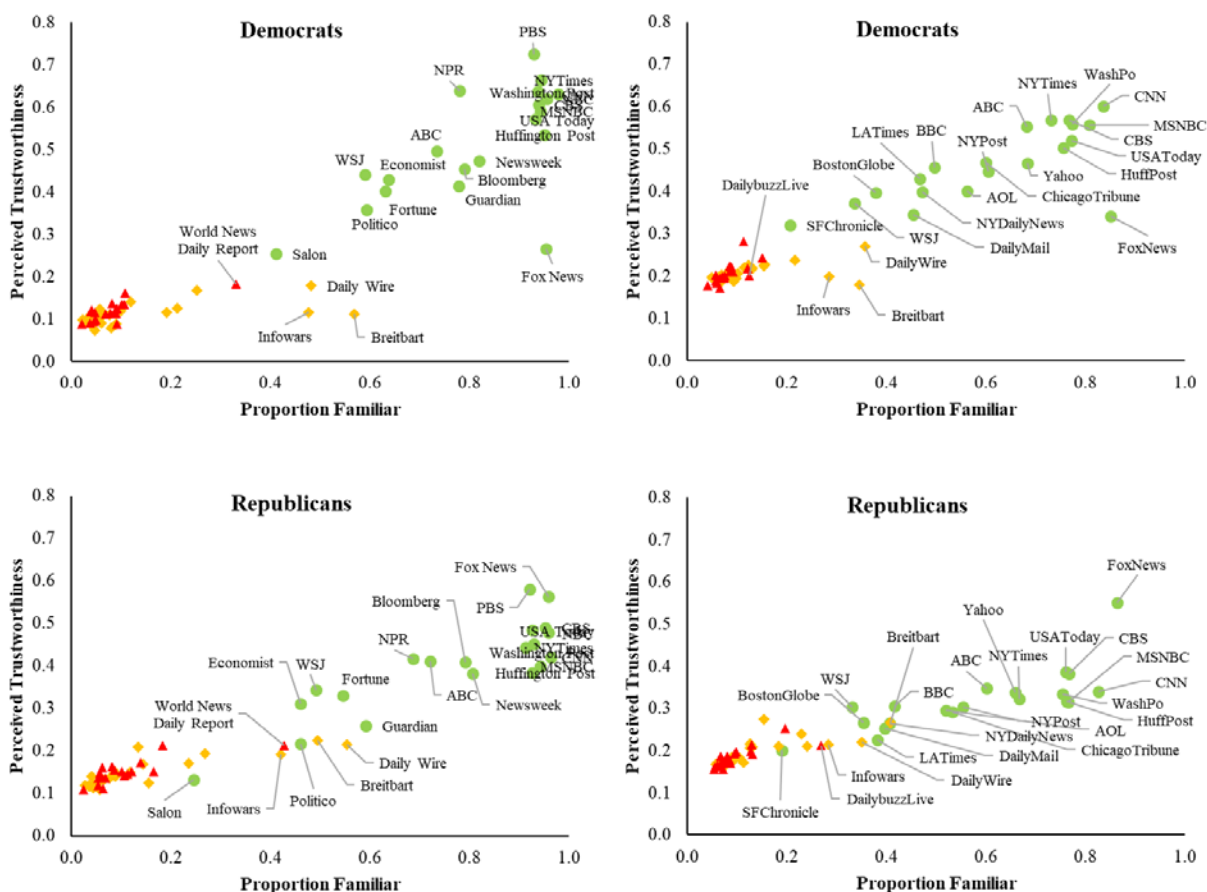

Figure S6. Average trust ratings (including unfamiliar participants) for each source plotted against proportion of participants familiar with each source, for Democratic (top row) and Republican (bottom row) participants from Study 1 (left column) and Study 2 (right column).

## 7. Regression model details for participant-level analyses associated with Figure 1

The statistical tests reported alongside Figure 1 in the main text were generated using the following regression model

$$y = b_1 + b_2 * Party + b_3 * FakeNews + b_4 * Party * FakeNews + b_5 * Hyperpartisan + b_6 * Party * Hyperpartisan + \epsilon$$

where Party takes on the value 0 if the participant is a Democrat and 1 if the participant is a Republican; FakeNews takes on the value 0 if the source is not a fake news site and 1 if the source is a fake news site; and Hyperpartisan takes on the value 0 if the source is not a hyper-partisan site and 1 if the source is a hyper-partisan site (thus mainstream sites are the reference group when coding source type). The resulting coefficients for each study are shown in Table S8. Finally, to test the significance of each of the differences reported the main text, we performed Wald tests evaluating the relevant net coefficients, which are listed in Table S9.

|                                          | (1)<br>Study 1         | (2)<br>Study 2         |
|------------------------------------------|------------------------|------------------------|
| Fake News (b <sub>3</sub> )              | -0.391***<br>(0.00835) | -0.250***<br>(0.00928) |
| Hyper-partisan (b <sub>5</sub> )         | -0.399***<br>(0.00807) | -0.255***<br>(0.00929) |
| Party (0=D, 1=R) (b <sub>2</sub> )       | -0.115***<br>(0.0123)  | -0.147***<br>(0.0144)  |
| Party X Fake (b <sub>4</sub> )           | 0.146***<br>(0.0133)   | 0.117***<br>(0.0123)   |
| Party X Hyper-partisan (b <sub>6</sub> ) | 0.154***<br>(0.0132)   | 0.137***<br>(0.0128)   |
| Constant (b <sub>1</sub> )               | 0.510***<br>(0.00730)  | 0.464***<br>(0.00930)  |
| Observations (ratings)                   | 60,075                 | 57,911                 |
| Clusters (participants)                  | 1,010                  | 971                    |
| R-squared                                | 0.304                  | 0.113                  |

Robust standard errors in parentheses

\*\*\* p<0.001, \*\* p<0.01, \* p<0.05

**Table S8.** Regression results predicting trust ratings based on source type and party. Robust standard errors clustered on participant. Unstandardized coefficients are shown, with standard errors in parentheses.



| <b>Comparison</b>                                 | <b>Test</b>                                |
|---------------------------------------------------|--------------------------------------------|
| Dem vs Rep for mainstream sources                 | $b_2=0$                                    |
| Dem vs Rep for hyper-partisan sources             | $b_2+b_6=0$                                |
| Dem vs Rep for fake news sources                  | $b_2+b_4=0$                                |
| Mainstream vs hyper-partisan for Dems             | $b_5=0$                                    |
| Mainstream vs hyper-partisan for Reps             | $b_5+b_6=0$                                |
| Mainstream vs fake news for Dems                  | $b_3=0$                                    |
| Mainstream vs fake news for Reps                  | $b_3+b_4=0$                                |
| Overall interaction between party and source type | Joint significance test of $b_4$ and $b_6$ |
| [Mainstream vs hyper-partisan] for Dems vs Reps   | $b_6=0$                                    |
| [Mainstream vs fake] for Dems vs Reps             | $b_4=0$                                    |

*Table S9.* Shown is the relevant test to evaluate each of the comparisons made in the main text related to Figure 1.

## 8. Partisanship versus ideology

In Table S10 we show that the results reported above in Table S8 are extremely similar when using a continuous measure of ideological conservatism, rather than a binary Democrat versus Republican measure of partisanship. To construct the continuous ideology measure, we average participants' responses to 5-point Likert scales assessing social conservatism and economic conservatism. For ease of interpretation, we rescale the conservatism variable to the interval [0,1] (so that a maximally liberal participant scores 0 and a maximally conservative participant scores 1). We also show that the relationships with conservatism are similar when just analyzing Democratic participants or just analyzing Republican participants. This emphasizes the robustness of our findings.

|                                  | (1)                   | (2)                   | (3)                   | (4)                   | (5)                   | (6)                   |
|----------------------------------|-----------------------|-----------------------|-----------------------|-----------------------|-----------------------|-----------------------|
|                                  | S1-All                | S1-Dems               | S1-Reps               | S2-All                | S2-Dems               | S2-Reps               |
| Fake News                        | -0.467***<br>(0.0128) | -0.458***<br>(0.0152) | -0.382***<br>(0.0365) | -0.307***<br>(0.0142) | -0.311***<br>(0.0180) | -0.208***<br>(0.0286) |
| Hyper-partisan                   | -0.476***<br>(0.0124) | -0.460***<br>(0.0145) | -0.408***<br>(0.0369) | -0.320***<br>(0.0143) | -0.312***<br>(0.0180) | -0.231***<br>(0.0298) |
| Conservatism (0-1)               | -0.197***<br>(0.0217) | -0.0798*<br>(0.0378)  | -0.144**<br>(0.0484)  | -0.253***<br>(0.0266) | -0.168***<br>(0.0449) | -0.135*<br>(0.0552)   |
| Conservatism X Fake              | 0.297***<br>(0.0242)  | 0.225***<br>(0.0414)  | 0.205***<br>(0.0520)  | 0.214***<br>(0.0218)  | 0.170***<br>(0.0406)  | 0.107**<br>(0.0368)   |
| Conservatism X<br>Hyper-partisan | 0.307***<br>(0.0241)  | 0.202***<br>(0.0402)  | 0.244***<br>(0.0533)  | 0.246***<br>(0.0223)  | 0.157***<br>(0.0410)  | 0.160***<br>(0.0382)  |
| Constant                         | 0.554***<br>(0.0110)  | 0.534***<br>(0.0131)  | 0.491***<br>(0.0343)  | 0.527***<br>(0.0150)  | 0.523***<br>(0.0179)  | 0.412***<br>(0.0403)  |
| Observations (ratings)           | 59,537                | 37,802                | 21,735                | 57,733                | 31,228                | 26,505                |
| Clusters (participants)          | 1,001                 | 635                   | 366                   | 968                   | 524                   | 444                   |
| R-squared                        | 0.307                 | 0.370                 | 0.179                 | 0.113                 | 0.153                 | 0.047                 |

Robust standard errors in parentheses

\*\*\* p<0.001, \*\* p<0.01, \* p<0.05

**Table S10.** Regression results predicting trust ratings based on source type and ideology. Robust standard errors clustered on participant. Unstandardized coefficients are shown, with standard errors in parentheses.

## 9. Partisan differences in trust are robust to accounting for political slant of sources

Here we present a set of post hoc analyses which take the political slant of the sources into account. Our goal was to assess the extent to which the partisan differences we observed (where Republicans trust mainstream sources less than Democrats) were explained by alignment with the political slant of the sources. This analysis was motivated by the observation that in our set of 60 sources, the mainstream sources appeared to be largely left-leaning, whereas the hyper-partisan and fake news sites tended to be right-leaning.

To determine the political slant of sources, we utilized the website Media Bias/Fact Check (<https://mediabiasfactcheck.com/>), which provides assessments of the liberal versus conservative bias of a great deal of news sites using a 7-point scale [1=Extreme Left, 2=Left, 3=Left-center, 4=Least Biased, 5=Right-center, 6=Right, 7=Extreme Right]. The website had partisan bias ratings for 44 of our 60 sites: all 20 mainstream sites, 16 hyper-partisan sites, and 8 fake news sites (see Table S11).

We first assessed the robustness of the interaction between partisanship and fact-checker ratings (i.e. the weaker association between participant ratings and fact-checker ratings among Republicans) in several ways. We began by creating a “political concordance” variable by reversing the coding of the slant variable for Democratic participants (i.e. 1=Maximal misalignment between source slant and participant partisanship, 7=Maximal alignment between source slant and participant partisanship), and showing that the Party X Fact-checker interaction remains significant and large when including this variable as a covariate (Table S12 model 2 versus model 3). Next, we allowed for non-parametric relationships between participant partisanship and source slant by including dummies for each level of source slant, and interacting each of these dummies with party (model 4). Finally, we repeated our main analyses restricting only to left-leaning sources (model 5), and only to right-leaning sources (model 6). In each case, the Party X Fact-checker interaction remains significant and large. These results indicate that the disagreement between Republicans and professional fact-checkers is not just a consequence of the over-representation of left-leaning sites among mainstream outlets and of right-leaning sites among hyper-partisan and fake news outlets in our list of sources.

We then showed similar results when looking at partisan differences by source type (i.e. the analysis presented in Table S8, accompanying Figure 1), rather than using fact-checker ratings – see Table S13. In particular, in all model specifications, Republicans trust mainstream news sources significantly less than Democrats (the coefficient on the Party dummy is significantly smaller than zero).

Together, these analyses support the conclusion that there are meaningful partisan differences in the ability to discern news source reliability, over and above any differences driven by political slant of the news sources in question.

| Mainstream         |              | Hyper-partisan          |                             | Fake news                 |                             |
|--------------------|--------------|-------------------------|-----------------------------|---------------------------|-----------------------------|
| nytimes.com        | Left-center  | dailykos.com            | Left                        | clashdaily.com            | Extreme right               |
| washingtonpost.com | Left-center  | crooksandliars.com      | Left                        | downtrend.com             | Extreme right               |
| usatoday.com       | Left-center  | dailywire.com           | Right                       | conservativedailypost.com | Extreme right               |
| wsj.com            | Right-center | redstate.com            | Right                       | onepoliticalplaza.com     |                             |
| latimes.com        | Left-center  | blacklistednews.com     | Conspiracy + Pseudo-science | yournewswire.com          | Conspiracy + Pseudo-science |
| nydailynews.com    | Left-center  | dailycaller.com         | Right                       | bb4sp.com                 | Extreme right               |
| nypost.com         | Right-center | commondreams.org        | Left                        | beforeitsnews.com         | Conspiracy + Pseudo-science |
| bostonglobe.com    | Left-center  | ijr.com                 | Right                       | whatdoesitmean.com        | Conspiracy + Pseudo-science |
| sfchronicle.com    | Left-center  | newsmax.com             | Right                       | socialeverythings.com     |                             |
| dailymail.co.uk    | Right        | thepoliticalinsider.com | Right                       | angrypatriotmovement.com  | Extreme right               |
| msnbc.com          | Left         | activepost.com          |                             | channel24news.com         |                             |
| cnn.com            | Left         | rawstory.com            | Left                        | freedomdaily.com          | Extreme right               |
| abcnews.go.com     | Left-center  | westernjournal.com      | Right                       | newsbreakshere.com        | Extreme right               |
| foxnews.com        | Right        | conservativetribune.com | Extreme right               | realnewsrightnow.com      | Satire                      |
| cbsnews.com        | Left-center  | dailysignal.com         | Right                       | notallowedto.com          | Satire                      |
| bbc.co.uk          | Left-center  | patriotpost.us          | Right                       | now8news.com              | Satire                      |
| news.yahoo.com     | Left-center  | antiwar.com             | Right-center                | react365.com              |                             |
| aol.com/news       | Left-center  | thedailysheep.com       | Conspiracy                  | americannews.com          |                             |
| huffingtonpost.com | Left         | breitbart.com           | Extreme right               | dailybuzzlive.com         |                             |
| chicagotribune.com | Right-center | infowars.com            | Conspiracy + Pseudo-science | thenewyorkevening.com     | Extreme right               |

**Table S11.** Ratings from MediaBiasFactCheck.com for each of the websites in Study 2. Websites not rated are left blank. Websites rated as conspiracy, pseudo-science, or satire are not included in our partisanship analyses, as these ratings do not include partisan leanings.

|                         | (1)<br>All sources    | (2)<br>Sources<br>with slant<br>ratings | (3)<br>Sources<br>with slant<br>ratings | (4)<br>Sources<br>with slant<br>ratings | (5)<br>Left-<br>leaning<br>sources | (6)<br>Right-<br>leaning<br>sources |
|-------------------------|-----------------------|-----------------------------------------|-----------------------------------------|-----------------------------------------|------------------------------------|-------------------------------------|
| Party (0=Dem, 1=Rep)    | -0.0120<br>(0.0150)   | -0.00138<br>(0.0151)                    | -0.0326*<br>(0.0152)                    | -0.0698***<br>(0.0157)                  | -0.0256<br>(0.0157)                | -0.00629<br>(0.0151)                |
| Fact-checker rating     | 0.405***<br>(0.0150)  | 0.412***<br>(0.0152)                    | 0.379***<br>(0.0151)                    | 0.388***<br>(0.0146)                    | 0.419***<br>(0.0158)               | 0.350***<br>(0.0162)                |
| Party X Fact-checker    | -0.217***<br>(0.0199) | -0.234***<br>(0.0204)                   | -0.169***<br>(0.0197)                   | -0.150***<br>(0.0199)                   | -0.226***<br>(0.0209)              | -0.0851***<br>(0.0226)              |
| Source concordance      |                       |                                         | 0.00810***<br>(0.000675)                |                                         |                                    |                                     |
| Left-Center             |                       |                                         |                                         | -0.0101*<br>(0.00493)                   |                                    |                                     |
| Right-Center            |                       |                                         |                                         | -0.00754<br>(0.00528)                   |                                    |                                     |
| Right                   |                       |                                         |                                         | -0.0353***<br>(0.00417)                 |                                    |                                     |
| Extreme Right           |                       |                                         |                                         | -0.0266***<br>(0.00383)                 |                                    |                                     |
| Party X Left-Center     |                       |                                         |                                         | 0.00474<br>(0.00714)                    |                                    |                                     |
| Party X Right-Center    |                       |                                         |                                         | 0.0231**<br>(0.00808)                   |                                    |                                     |
| Party X Right           |                       |                                         |                                         | 0.0915***<br>(0.00730)                  |                                    |                                     |
| Party X Extreme Right   |                       |                                         |                                         | 0.0708***<br>(0.00626)                  |                                    |                                     |
| Constant                | 0.202***<br>(0.0105)  | 0.198***<br>(0.0106)                    | 0.181***<br>(0.0108)                    | 0.223***<br>(0.0106)                    | 0.200***<br>(0.0109)               | 0.201***<br>(0.0106)                |
| Observations (ratings)  | 57,911                | 42,461                                  | 42,461                                  | 42,461                                  | 18,338                             | 24,123                              |
| Clusters (participants) | 971                   | 971                                     | 971                                     | 971                                     | 971                                | 971                                 |
| R-squared               | 0.111                 | 0.120                                   | 0.121                                   | 0.122                                   | 0.132                              | 0.047                               |

Robust standard errors in parentheses

\*\*\* p<0.001, \*\* p<0.01, \* p<0.05

**Table S12.** Regression results predicting trust ratings based on party and third-party fact-checker ratings. Robust standard errors clustered on participant. Unstandardized coefficients are shown, with standard errors in parentheses.

|                         | (1)                    | (2)                    | (3)                     | (4)                     | (5)                   | (6)                    |
|-------------------------|------------------------|------------------------|-------------------------|-------------------------|-----------------------|------------------------|
|                         | All                    | Sources                | Sources                 | Sources                 | Left-                 | Right-                 |
|                         | sources                | with slant             | with slant              | with slant              | leaning               | leaning                |
|                         |                        | ratings                | ratings                 | ratings                 | sources               | sources                |
| Fake News               | -0.250***<br>(0.00928) | -0.255***<br>(0.00952) | -0.206***<br>(0.00915)  | -0.216***<br>(0.00988)  |                       | -0.186***<br>(0.00822) |
| Hyper-partisan          | -0.255***<br>(0.00929) | -0.253***<br>(0.00920) | -0.230***<br>(0.00891)  | -0.236***<br>(0.00861)  | -0.281***<br>(0.0103) | -0.182***<br>(0.00795) |
| Party (0=Dem, 1=Rep)    | -0.147***<br>(0.0144)  | -0.147***<br>(0.0144)  | -0.132***<br>(0.0142)   | -0.125***<br>(0.0154)   | -0.177***<br>(0.0151) | -0.0548***<br>(0.0142) |
| Party X Fake News       | 0.117***<br>(0.0123)   | 0.124***<br>(0.0127)   | 0.0257*<br>(0.0120)     | -0.0346*<br>(0.0153)    |                       | 0.0320**<br>(0.0116)   |
| Party X Hyper-partisan  | 0.137***<br>(0.0128)   | 0.138***<br>(0.0127)   | 0.0933***<br>(0.0117)   | 0.0684***<br>(0.0121)   | 0.139***<br>(0.0140)  | 0.0559***<br>(0.0112)  |
| Source concordance      |                        |                        | 0.0138***<br>(0.000903) |                         |                       |                        |
| Left-Center             |                        |                        |                         | 0.0574***<br>(0.00552)  |                       |                        |
| Right-Center            |                        |                        |                         | 0.0375***<br>(0.00513)  |                       |                        |
| Right                   |                        |                        |                         | 0.00286<br>(0.00625)    |                       |                        |
| Extreme Right           |                        |                        |                         | -0.00721<br>(0.00743)   |                       |                        |
| Party X Left-Center     |                        |                        |                         | -0.0349***<br>(0.00843) |                       |                        |
| Party X Right-Center    |                        |                        |                         | -0.0395***<br>(0.00762) |                       |                        |
| Party X Right           |                        |                        |                         | 0.0697***<br>(0.00868)  |                       |                        |
| Party X Extreme Right   |                        |                        |                         | 0.137***<br>(0.0122)    |                       |                        |
| Constant                | 0.464***<br>(0.00930)  | 0.464***<br>(0.00930)  | 0.401***<br>(0.00975)   | 0.432***<br>(0.0102)    | 0.487***<br>(0.00969) | 0.395***<br>(0.00933)  |
| Observations (ratings)  | 57,911                 | 42,461                 | 42,461                  | 42,461                  | 18,338                | 24,123                 |
| Clusters (participants) | 971                    | 971                    | 971                     | 971                     | 971                   | 971                    |
| R-squared               | 0.113                  | 0.122                  | 0.125                   | 0.127                   | 0.136                 | 0.054                  |

Robust standard errors in parentheses

\*\*\* p<0.001, \*\* p<0.01, \* p<0.05

**Table S13.** Regression results predicting trust ratings based on party and source type. Robust standard errors clustered on participant. Unstandardized coefficients are shown, with standard errors in parentheses.

## 10. Full materials – Study 1

---

### Start of Block: WorkerID

WorkerID

**To begin, please enter your Amazon Mechanical Turk Worker ID here:**

(Please see below for where you can find your Worker ID.)

Your Worker ID starts with the letter A and has 12-14 letters or numbers. It is NOT your email address. If we do not have your correct Worker ID we will not be able to pay you.

---

-----  
IDInst Note that your Worker ID can be found on your dashboard page:

### End of Block: WorkerID

---

### Start of Block: Instruction

Inst

You will be presented with a series of media sources.

We are interested in two things:

- 1) Whether you are familiar with the media source.
- 2) Whether you trust the information that comes from the media source.

### End of Block: Instruction

---

### Start of Block: Familiarity

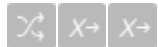

Familiarity Do you recognize the following websites?

|                         | No (0)                | Yes (1)               |
|-------------------------|-----------------------|-----------------------|
| bloomberg.com (2)       | <input type="radio"/> | <input type="radio"/> |
| fortune.com (3)         | <input type="radio"/> | <input type="radio"/> |
| foxnews.com (4)         | <input type="radio"/> | <input type="radio"/> |
| huffingtonpost.com (5)  | <input type="radio"/> | <input type="radio"/> |
| theguardian.com (6)     | <input type="radio"/> | <input type="radio"/> |
| npr.org (7)             | <input type="radio"/> | <input type="radio"/> |
| msnbc.com (8)           | <input type="radio"/> | <input type="radio"/> |
| cnn.com (9)             | <input type="radio"/> | <input type="radio"/> |
| washingtonpost.com (10) | <input type="radio"/> | <input type="radio"/> |
| newsweek.com (11)       | <input type="radio"/> | <input type="radio"/> |
| usatoday.com (12)       | <input type="radio"/> | <input type="radio"/> |
| nytimes.com (13)        | <input type="radio"/> | <input type="radio"/> |
| politico.com (14)       | <input type="radio"/> | <input type="radio"/> |
| salon.com (15)          | <input type="radio"/> | <input type="radio"/> |
| pbs.org (16)            | <input type="radio"/> | <input type="radio"/> |
| wsj.com (17)            | <input type="radio"/> | <input type="radio"/> |
| economist.com (18)      | <input type="radio"/> | <input type="radio"/> |
| abc.go.com (19)         | <input type="radio"/> | <input type="radio"/> |
| cbs.com (20)            | <input type="radio"/> | <input type="radio"/> |



|                              |                       |                       |
|------------------------------|-----------------------|-----------------------|
| nbc.com (21)                 | <input type="radio"/> | <input type="radio"/> |
| pamelageller.com (22)        | <input type="radio"/> | <input type="radio"/> |
| trueactivist.com (23)        | <input type="radio"/> | <input type="radio"/> |
| thefederalistpapers.org (24) | <input type="radio"/> | <input type="radio"/> |
| palmerreport.com (25)        | <input type="radio"/> | <input type="radio"/> |
| redflagnews.com (26)         | <input type="radio"/> | <input type="radio"/> |
| regated.com (27)             | <input type="radio"/> | <input type="radio"/> |
| rightwingnews.com (28)       | <input type="radio"/> | <input type="radio"/> |
| chicksontheright.com (29)    | <input type="radio"/> | <input type="radio"/> |
| youngcons.com (30)           | <input type="radio"/> | <input type="radio"/> |
| usuncut.com (31)             | <input type="radio"/> | <input type="radio"/> |
| newcenturytimes.com (32)     | <input type="radio"/> | <input type="radio"/> |
| dailycaller.com (33)         | <input type="radio"/> | <input type="radio"/> |
| dailynewsbin.com (34)        | <input type="radio"/> | <input type="radio"/> |
| dailywire.com (35)           | <input type="radio"/> | <input type="radio"/> |
| heatst.com (36)              | <input type="radio"/> | <input type="radio"/> |
| conservativetribune.com (37) | <input type="radio"/> | <input type="radio"/> |
| ahtribune.com (38)           | <input type="radio"/> | <input type="radio"/> |
| dailykos.com (39)            | <input type="radio"/> | <input type="radio"/> |
| breitbart.com (40)           | <input type="radio"/> | <input type="radio"/> |

|                                  |                       |                       |
|----------------------------------|-----------------------|-----------------------|
| infowars.com (41)                | <input type="radio"/> | <input type="radio"/> |
| react365.com (42)                | <input type="radio"/> | <input type="radio"/> |
| civictribune.com (43)            | <input type="radio"/> | <input type="radio"/> |
| empireherald.com (44)            | <input type="radio"/> | <input type="radio"/> |
| now8news.com (45)                | <input type="radio"/> | <input type="radio"/> |
| notallowedto.com (46)            | <input type="radio"/> | <input type="radio"/> |
| theracketreport.com (47)         | <input type="radio"/> | <input type="radio"/> |
| news4ktla.com (48)               | <input type="radio"/> | <input type="radio"/> |
| newsexaminer.net (49)            | <input type="radio"/> | <input type="radio"/> |
| usasupreme.com (50)              | <input type="radio"/> | <input type="radio"/> |
| americannews.com (51)            | <input type="radio"/> | <input type="radio"/> |
| freedomdaily.com (52)            | <input type="radio"/> | <input type="radio"/> |
| thelastlineofdefense.org (53)    | <input type="radio"/> | <input type="radio"/> |
| dailyheadlines.net (54)          | <input type="radio"/> | <input type="radio"/> |
| commondreams.org (55)            | <input type="radio"/> | <input type="radio"/> |
| bipartisanreport.com (56)        | <input type="radio"/> | <input type="radio"/> |
| uspoliticsinfo.com (57)          | <input type="radio"/> | <input type="radio"/> |
| thenewyorkevening.com (58)       | <input type="radio"/> | <input type="radio"/> |
| worldnewsdailyreport.com<br>(59) | <input type="radio"/> | <input type="radio"/> |

conservativedailypost.com  
(60)

globalrealnews.com (61)

End of Block: Familiarity

---

Start of Block: Trust

**Trust** How much do you trust each of these domains?

|                         | Not at all<br>(1)     | Barely (2)            | Somewhat<br>(3)       | A lot (4)             | Entirely (5)          |
|-------------------------|-----------------------|-----------------------|-----------------------|-----------------------|-----------------------|
| bloomberg.com (2)       | <input type="radio"/> |
| fortune.com (3)         | <input type="radio"/> |
| foxnews.com (4)         | <input type="radio"/> |
| huffingtonpost.com (5)  | <input type="radio"/> |
| theguardian.com (6)     | <input type="radio"/> |
| npr.org (7)             | <input type="radio"/> |
| msnbc.com (8)           | <input type="radio"/> |
| cnn.com (9)             | <input type="radio"/> |
| washingtonpost.com (10) | <input type="radio"/> |
| newsweek.com (11)       | <input type="radio"/> |
| usatoday.com (12)       | <input type="radio"/> |
| nytimes.com (13)        | <input type="radio"/> |
| politico.com (14)       | <input type="radio"/> |
| salon.com (15)          | <input type="radio"/> |
| pbs.org (16)            | <input type="radio"/> |
| wsj.com (17)            | <input type="radio"/> |
| economist.com (18)      | <input type="radio"/> |
| abc.go.com (19)         | <input type="radio"/> |
| cbs.com (20)            | <input type="radio"/> |

|                                 |                       |                       |                       |                       |                       |
|---------------------------------|-----------------------|-----------------------|-----------------------|-----------------------|-----------------------|
| nbc.com (21)                    | <input type="radio"/> |
| pamelageller.com (22)           | <input type="radio"/> |
| trueactivist.com (23)           | <input type="radio"/> |
| thefederalistpapers.org<br>(24) | <input type="radio"/> |
| palmerreport.com (25)           | <input type="radio"/> |
| redflagnews.com (26)            | <input type="radio"/> |
| regated.com (27)                | <input type="radio"/> |
| rightwingnews.com (28)          | <input type="radio"/> |
| chicksontheright.com (29)       | <input type="radio"/> |
| youngcons.com (30)              | <input type="radio"/> |
| usuncut.com (31)                | <input type="radio"/> |
| newcenturytimes.com (32)        | <input type="radio"/> |
| dailycaller.com (33)            | <input type="radio"/> |
| dailynewsbin.com (34)           | <input type="radio"/> |
| dailywire.com (35)              | <input type="radio"/> |
| heatst.com (36)                 | <input type="radio"/> |
| conservativetribune.com<br>(37) | <input type="radio"/> |
| ahtribune.com (38)              | <input type="radio"/> |
| dailykos.com (39)               | <input type="radio"/> |

|                                  |                       |                       |                       |                       |                       |
|----------------------------------|-----------------------|-----------------------|-----------------------|-----------------------|-----------------------|
| breitbart.com (40)               | <input type="radio"/> |
| infowars.com (41)                | <input type="radio"/> |
| react365.com (42)                | <input type="radio"/> |
| civictribune.com (43)            | <input type="radio"/> |
| empireherald.com (44)            | <input type="radio"/> |
| now8news.com (45)                | <input type="radio"/> |
| notallowedto.com (46)            | <input type="radio"/> |
| theracketreport.com (47)         | <input type="radio"/> |
| news4ktla.com (48)               | <input type="radio"/> |
| newsexaminer.net (49)            | <input type="radio"/> |
| usasupreme.com (50)              | <input type="radio"/> |
| americannews.com (51)            | <input type="radio"/> |
| freedomdaily.com (52)            | <input type="radio"/> |
| thelastlineofdefense.org<br>(53) | <input type="radio"/> |
| dailyheadlines.net (54)          | <input type="radio"/> |
| commondreams.org (55)            | <input type="radio"/> |
| bipartisanreport.com (56)        | <input type="radio"/> |
| uspoliticsinfo.com (57)          | <input type="radio"/> |
| thenewyorkevening.com<br>(58)    | <input type="radio"/> |

|                                   |                       |                       |                       |                       |                       |
|-----------------------------------|-----------------------|-----------------------|-----------------------|-----------------------|-----------------------|
| worldnewsdailyreport.com<br>(59)  | <input type="radio"/> |
| conservativedailypost.com<br>(60) | <input type="radio"/> |
| globalrealnews.com (61)           | <input type="radio"/> |

End of Block: Trust

---

Start of Block: CRT

CRTInst In the next section, you will be asked 3 questions. Please do your best to answer as accurately as possible.

---

Page Break

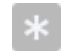

CRT1\_1 The ages of Mark and Adam add up to 28 years total. Mark is 20 years older than Adam. How many years old is Adam?

---

---

Page Break

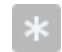

CRT1\_2 If it takes 10 seconds for 10 printers to print out 10 pages of paper, how many seconds will it take 50 printers to print out 50 pages of paper?

---

---

Page Break

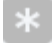

CRT1\_3 On a loaf of bread, there is a patch of mold. Every day, the patch doubles in size. If it takes 40 days for the patch to cover the entire loaf of bread, how many days would it take for the patch to cover half of the loaf of bread?

---

---

Page Break

CRT\_Chk Have you seen any of the last 3 word problems before?

- Yes (1)
- Maybe (2)
- No (3)

End of Block: CRT

---

Start of Block: Demographics

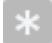

Age What is your age?

---

---

Sex What is your sex?

- Male (1)
  - Female (2)
-



Education What is the highest level of school you have completed or the highest degree you have received?

- Less than high school degree (1)
  - High school graduate (high school diploma or equivalent including GED) (2)
  - Some college but no degree (3)
  - Associate degree in college (2-year) (4)
  - Bachelor's degree in college (4-year) (5)
  - Master's degree (6)
  - Doctoral degree (7)
  - Professional degree (JD, MD) (8)
- 

English Are you fluent in English

- Yes (1)
  - No (2)
-

god How strongly do you believe in the existence of a God or Gods?

- 1 - Very little (1)
  - 2 (2)
  - 3 (3)
  - 4 (4)
  - 5 (5)
  - 6 (6)
  - 7 - Very much (7)
- 

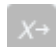

Party Which of the following best describes your political position?

- Democrat (1)
  - Republican (2)
  - Independent (3)
  - Other (specify) (6) \_\_\_\_\_
-

Social\_Conserv On social issues I am:

- Strongly Liberal (1)
  - Somewhat Liberal (2)
  - Moderate (3)
  - Somewhat Conservative (4)
  - Strongly Conservative (5)
- 

Economic\_Conserv On economic issues I am:

- Strongly Liberal (1)
  - Somewhat Liberal (2)
  - Moderate (3)
  - Somewhat Conservative (4)
  - Strongly Conservative (5)
- 

POTUS2016 Who did you vote for in the 2016 Presidential Election?

Reminder: This survey is anonymous.

- Hillary Clinton (1)
  - Donald Trump (2)
  - Other candidate (such as Jill Stein or Gary Johnson) (3)
  - I did not vote for reasons outside of my control (4)
  - I did not vote, but I could have (5)
  - I did not vote out of protest (6)
- 

ClintonTrump If you absolutely had to choose between only Clinton and Trump, who would you prefer to be the President of the United States?

- Hillary Clinton (1)
  - Donald Trump (2)
- 

DemRep If you absolutely had to choose between only the Democratic and Republican party, which would do you prefer?

- Democratic party (1)
  - Republican party (2)
-

Congress2018 If an election for U.S. Congress were being held today, who would you vote for in the district where you live?

- The Democratic Party candidate (1)
- The Republican Party candidate (2)
- Other (3)
- Not sure (4)
- I would not vote (5)

*Skip To: End of Block If If an election for U.S. Congress were being held today, who would you vote for in the district wh... != Not sure*

Congress2018\_2 If you were forced to choose one of the following options (in terms of who you would vote for in the U.S. Congressional election), which would you choose?

- The Democratic Party candidate (1)
- The Republican Party candidate (2)
- Other (3)
- I would not vote (4)

**End of Block: Demographics**

---

**Start of Block: Random**

Random Did you respond randomly at any point during the study?

Note: Please be honest! You will get your HIT regardless of your response.

- Yes (1)
  - No (2)
-

Google

Did you search the internet (via Google or otherwise) for any of the media sources?

Note: Please be honest! You will get your HIT regardless of your response.

Yes (1)

No (2)

**End of Block: Random**

---

**Start of Block: Comments/ Length**

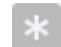

Zipcode Please enter the ZIP code for your primary residence.

Reminder: This survey is anonymous.

---

---

Comments Do you have any comments about our survey?

---

---

Length Roughly how long did this survey take you to complete?

---

**End of Block: Comments/ Length**

---

## 11. Full materials – Study 2

---

### Start of Block: Instruction

Inst

You will be presented with a series of media sources.

We are interested in two things:

- 1) Whether you are familiar with the media source.
- 2) Whether you trust the information that comes from the media source. That is, in your opinion, does the source produce truthful news content that is relatively unbiased/balanced.

### End of Block: Instruction

---

### Start of Block: Familiarity

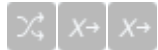

Familiarity Do you recognize the following websites?

|                         | No (0)                | Yes (1)               |
|-------------------------|-----------------------|-----------------------|
| nytimes.com (2)         | <input type="radio"/> | <input type="radio"/> |
| washingtonpost.com (3)  | <input type="radio"/> | <input type="radio"/> |
| usatoday.com (4)        | <input type="radio"/> | <input type="radio"/> |
| wsj.com (5)             | <input type="radio"/> | <input type="radio"/> |
| latimes.com (6)         | <input type="radio"/> | <input type="radio"/> |
| nydailynews.com (7)     | <input type="radio"/> | <input type="radio"/> |
| nypost.com (8)          | <input type="radio"/> | <input type="radio"/> |
| bostonglobe.com (9)     | <input type="radio"/> | <input type="radio"/> |
| sfchronicle.com (10)    | <input type="radio"/> | <input type="radio"/> |
| dailymail.co.uk (11)    | <input type="radio"/> | <input type="radio"/> |
| msnbc.com (12)          | <input type="radio"/> | <input type="radio"/> |
| cnn.com (13)            | <input type="radio"/> | <input type="radio"/> |
| abcnews.go.com (14)     | <input type="radio"/> | <input type="radio"/> |
| foxnews.com (15)        | <input type="radio"/> | <input type="radio"/> |
| cbsnews.com (16)        | <input type="radio"/> | <input type="radio"/> |
| bbc.co.uk (17)          | <input type="radio"/> | <input type="radio"/> |
| news.yahoo.com (18)     | <input type="radio"/> | <input type="radio"/> |
| aol.com/news (19)       | <input type="radio"/> | <input type="radio"/> |
| huffingtonpost.com (20) | <input type="radio"/> | <input type="radio"/> |



|                              |                       |                       |
|------------------------------|-----------------------|-----------------------|
| chicagotribune.com (21)      | <input type="radio"/> | <input type="radio"/> |
| dailykos.com (22)            | <input type="radio"/> | <input type="radio"/> |
| crooksandliars.com (23)      | <input type="radio"/> | <input type="radio"/> |
| dailywire.com (24)           | <input type="radio"/> | <input type="radio"/> |
| redstate.com (25)            | <input type="radio"/> | <input type="radio"/> |
| blacklistednews.com (26)     | <input type="radio"/> | <input type="radio"/> |
| dailycaller.com (27)         | <input type="radio"/> | <input type="radio"/> |
| commondreams.org (28)        | <input type="radio"/> | <input type="radio"/> |
| ijr.com (29)                 | <input type="radio"/> | <input type="radio"/> |
| newsmax.com (30)             | <input type="radio"/> | <input type="radio"/> |
| thepoliticalinsider.com (31) | <input type="radio"/> | <input type="radio"/> |
| activepost.com (32)          | <input type="radio"/> | <input type="radio"/> |
| rawstory.com (33)            | <input type="radio"/> | <input type="radio"/> |
| westernjournal.com (34)      | <input type="radio"/> | <input type="radio"/> |
| conservativetribune.com (35) | <input type="radio"/> | <input type="radio"/> |
| dailysignal.com (36)         | <input type="radio"/> | <input type="radio"/> |
| patriotpost.us (37)          | <input type="radio"/> | <input type="radio"/> |
| antiwar.com (38)             | <input type="radio"/> | <input type="radio"/> |
| thedailysheep.com (39)       | <input type="radio"/> | <input type="radio"/> |
| breitbart.com (40)           | <input type="radio"/> | <input type="radio"/> |

|                               |                       |                       |
|-------------------------------|-----------------------|-----------------------|
| infowars.com (41)             | <input type="radio"/> | <input type="radio"/> |
| clashdaily.com (42)           | <input type="radio"/> | <input type="radio"/> |
| downtrend.com (43)            | <input type="radio"/> | <input type="radio"/> |
| conservativedaily.com (44)    | <input type="radio"/> | <input type="radio"/> |
| onpoliticalplaza.com (45)     | <input type="radio"/> | <input type="radio"/> |
| yournewswire.com (46)         | <input type="radio"/> | <input type="radio"/> |
| bb4sp.com (47)                | <input type="radio"/> | <input type="radio"/> |
| beforeitsnews.com (48)        | <input type="radio"/> | <input type="radio"/> |
| whatdoesitmean.com (49)       | <input type="radio"/> | <input type="radio"/> |
| socialeverything.com (50)     | <input type="radio"/> | <input type="radio"/> |
| angrypatriotmovement.com (51) | <input type="radio"/> | <input type="radio"/> |
| channel24news.com (52)        | <input type="radio"/> | <input type="radio"/> |
| freedomdaily.com (53)         | <input type="radio"/> | <input type="radio"/> |
| newsbreakshere.com (54)       | <input type="radio"/> | <input type="radio"/> |
| realnewsrightnow.com (55)     | <input type="radio"/> | <input type="radio"/> |
| notallowedto.com (56)         | <input type="radio"/> | <input type="radio"/> |
| now8news.com (57)             | <input type="radio"/> | <input type="radio"/> |
| react365.com (58)             | <input type="radio"/> | <input type="radio"/> |
| americannews.com (59)         | <input type="radio"/> | <input type="radio"/> |

|                            |                       |                       |
|----------------------------|-----------------------|-----------------------|
| dailybuzzlive.com (60)     | <input type="radio"/> | <input type="radio"/> |
| thenewyorkevening.com (61) | <input type="radio"/> | <input type="radio"/> |

End of Block: Familiarity

---

Start of Block: Trust

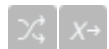

Trust How much do you trust each of these domains?

|                         | <b>Not at all</b><br>(1) | <b>Barely</b> (2)     | <b>Somewhat</b><br>(3) | <b>A lot</b> (4)      | <b>Entirely</b><br>(5) |
|-------------------------|--------------------------|-----------------------|------------------------|-----------------------|------------------------|
| nytimes.com (2)         | <input type="radio"/>    | <input type="radio"/> | <input type="radio"/>  | <input type="radio"/> | <input type="radio"/>  |
| washingtonpost.com (3)  | <input type="radio"/>    | <input type="radio"/> | <input type="radio"/>  | <input type="radio"/> | <input type="radio"/>  |
| usatoday.com (4)        | <input type="radio"/>    | <input type="radio"/> | <input type="radio"/>  | <input type="radio"/> | <input type="radio"/>  |
| wsj.com (5)             | <input type="radio"/>    | <input type="radio"/> | <input type="radio"/>  | <input type="radio"/> | <input type="radio"/>  |
| latimes.com (6)         | <input type="radio"/>    | <input type="radio"/> | <input type="radio"/>  | <input type="radio"/> | <input type="radio"/>  |
| nydailynews.com (7)     | <input type="radio"/>    | <input type="radio"/> | <input type="radio"/>  | <input type="radio"/> | <input type="radio"/>  |
| nypost.com (8)          | <input type="radio"/>    | <input type="radio"/> | <input type="radio"/>  | <input type="radio"/> | <input type="radio"/>  |
| bostonglobe.com (9)     | <input type="radio"/>    | <input type="radio"/> | <input type="radio"/>  | <input type="radio"/> | <input type="radio"/>  |
| sfchronicle.com (10)    | <input type="radio"/>    | <input type="radio"/> | <input type="radio"/>  | <input type="radio"/> | <input type="radio"/>  |
| dailymail.co.uk (11)    | <input type="radio"/>    | <input type="radio"/> | <input type="radio"/>  | <input type="radio"/> | <input type="radio"/>  |
| msnbc.com (12)          | <input type="radio"/>    | <input type="radio"/> | <input type="radio"/>  | <input type="radio"/> | <input type="radio"/>  |
| cnn.com (13)            | <input type="radio"/>    | <input type="radio"/> | <input type="radio"/>  | <input type="radio"/> | <input type="radio"/>  |
| abcnews.go.com (14)     | <input type="radio"/>    | <input type="radio"/> | <input type="radio"/>  | <input type="radio"/> | <input type="radio"/>  |
| foxnews.com (15)        | <input type="radio"/>    | <input type="radio"/> | <input type="radio"/>  | <input type="radio"/> | <input type="radio"/>  |
| cbsnews.com (16)        | <input type="radio"/>    | <input type="radio"/> | <input type="radio"/>  | <input type="radio"/> | <input type="radio"/>  |
| bbc.co.uk (17)          | <input type="radio"/>    | <input type="radio"/> | <input type="radio"/>  | <input type="radio"/> | <input type="radio"/>  |
| news.yahoo.com (18)     | <input type="radio"/>    | <input type="radio"/> | <input type="radio"/>  | <input type="radio"/> | <input type="radio"/>  |
| aol.com/news (19)       | <input type="radio"/>    | <input type="radio"/> | <input type="radio"/>  | <input type="radio"/> | <input type="radio"/>  |
| huffingtonpost.com (20) | <input type="radio"/>    | <input type="radio"/> | <input type="radio"/>  | <input type="radio"/> | <input type="radio"/>  |

|                                 |                       |                       |                       |                       |                       |
|---------------------------------|-----------------------|-----------------------|-----------------------|-----------------------|-----------------------|
| chicagotribune.com (21)         | <input type="radio"/> |
| dailykos.com (22)               | <input type="radio"/> |
| crooksandliars.com (23)         | <input type="radio"/> |
| dailywire.com (24)              | <input type="radio"/> |
| redstate.com (25)               | <input type="radio"/> |
| blacklistednews.com (26)        | <input type="radio"/> |
| dailycaller.com (27)            | <input type="radio"/> |
| commondreams.org (28)           | <input type="radio"/> |
| ijr.com (29)                    | <input type="radio"/> |
| newsmax.com (30)                | <input type="radio"/> |
| thepoliticalinsider.com<br>(31) | <input type="radio"/> |
| activepost.com (32)             | <input type="radio"/> |
| rawstory.com (33)               | <input type="radio"/> |
| westernjournal.com (34)         | <input type="radio"/> |
| conservativetribune.com<br>(35) | <input type="radio"/> |
| daily signal.com (36)           | <input type="radio"/> |
| patriotpost.us (37)             | <input type="radio"/> |
| antiwar.com (38)                | <input type="radio"/> |
| thedailysheep.com (39)          | <input type="radio"/> |

|                                   |                       |                       |                       |                       |                       |
|-----------------------------------|-----------------------|-----------------------|-----------------------|-----------------------|-----------------------|
| breitbart.com (40)                | <input type="radio"/> |
| infowars.com (41)                 | <input type="radio"/> |
| clashdaily.com (42)               | <input type="radio"/> |
| downtrend.com (43)                | <input type="radio"/> |
| conservativedailypost.com<br>(44) | <input type="radio"/> |
| onepoliticalplaza.com (45)        | <input type="radio"/> |
| yournewswire.com (46)             | <input type="radio"/> |
| bb4sp.com (47)                    | <input type="radio"/> |
| beforeitsnews.com (48)            | <input type="radio"/> |
| whatdoesitmean.com (49)           | <input type="radio"/> |
| socialeverything.com (50)         | <input type="radio"/> |
| angrypatriotmovement.com<br>(51)  | <input type="radio"/> |
| channel24news.com (52)            | <input type="radio"/> |
| freedomdaily.com (53)             | <input type="radio"/> |
| newsbreakshere.com (54)           | <input type="radio"/> |
| realnewsrightnow.com (55)         | <input type="radio"/> |
| notallowedto.com (56)             | <input type="radio"/> |
| now8news.com (57)                 | <input type="radio"/> |
| react365.com (58)                 | <input type="radio"/> |

|                               |                       |                       |                       |                       |                       |
|-------------------------------|-----------------------|-----------------------|-----------------------|-----------------------|-----------------------|
| americannews.com (59)         | <input type="radio"/> |
| dailybuzzlive.com (60)        | <input type="radio"/> |
| thenewyorkevening.com<br>(61) | <input type="radio"/> |

End of Block: Trust

---

Start of Block: CRT

Inst In the following section you will be asked several questions. Please do your best to answer as accurately as possible.

---

Page Break

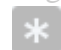

CRT1\_1 The ages of Mark and Adam add up to 28 years total. Mark is 20 years older than Adam. How many years old is Adam?

---

---

CRT1\_1\_RT Timing

First Click (1)

Last Click (2)

Page Submit (3)

Click Count (4)

---

Page Break

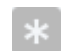

CRT1\_2 If it takes 10 seconds for 10 printers to print out 10 pages of paper, how many seconds will it take 50 printers to print out 50 pages of paper?

---

## CRT1\_2\_RT Timing

First Click (1)

Last Click (2)

Page Submit (3)

Click Count (4)

---

---

Page Break

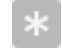

CRT1\_3 On a loaf of bread, there is a patch of mold. Every day, the patch doubles in size. If it takes 40 days for the patch to cover the entire loaf of bread, how many days would it take for the patch to cover half of the loaf of bread?

---

## CRT1\_3\_RT Timing

First Click (1)

Last Click (2)

Page Submit (3)

Click Count (4)

---

---

Page Break

CRT3\_1 If you're running a race and you pass the person in second place, what place are you in?

---

## CRT3\_1\_RT Timing

First Click (1)

Last Click (2)

Page Submit (3)

Click Count (4)

---

---

Page Break





CRT3\_2 A farmer had 15 sheep and all but 8 died. How many are left?

---

---

CRT3\_2\_RT Timing

First Click (1)

Last Click (2)

Page Submit (3)

Click Count (4)

---

---

Page Break

CRT3\_3 Emily's father has three daughters. The first two are named April and May. What is the third daughter's name?

---

---

CRT3\_3\_RT Timing

First Click (1)

Last Click (2)

Page Submit (3)

Click Count (4)

---

---

Page Break

CRT3\_4 How many cubic feet of dirt are there in a hole that is 3' deep x 3' wide x 3' long?

---

---

CRT3\_4\_RT Timing

First Click (1)

Last Click (2)

Page Submit (3)

Click Count (4)

**End of Block: CRT**

---

**Start of Block: Demographics**

American Do you live in the United States?

- Yes (5)
- No (please specify where) (6)
- 

Social\_Conserv On social issues I am:

- Strongly Liberal (1)
- Somewhat Liberal (2)
- Moderate (3)
- Somewhat Conservative (4)
- Strongly Conservative (5)
- 

Economic\_Conserv On economic issues I am:

- Strongly Liberal (1)
- Somewhat Liberal (2)
- Moderate (3)
- Somewhat Conservative (4)
- Strongly Conservative (5)
- 

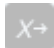

Party Which of the following best describes your political position?

- Democrat (1)
- Republican (2)
- Independent (3)
- Other (specify) (6) \_\_\_\_\_

DemRep\_C Which of the following best describes your political preference?

- Strongly Democratic (1)
- Democratic (2)
- Lean Democratic (3)
- Lean Republican (4)
- Republican (5)
- Strongly Republican (6)

SocialCircle\_2 What percentage of your social circle (friends and family) do you think votes like yourself?

(For example: If you vote Democrat, what percentage also votes Democrat? / If you vote Republican, what percentage also votes Republican?)

Very few vote like me      Most vote like me

0                      50                      100

What percentage of your social circle (friends and family) do you think votes like yourself?

( )

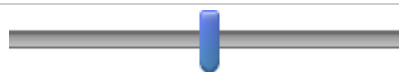

---

POTUS2016 Who did you vote for in the 2016 Presidential Election?

Reminder: This survey is anonymous.

- Hillary Clinton (1)
  - Donald Trump (2)
  - Other candidate (such as Jill Stein or Gary Johnson) (3)
  - I did not vote for reasons outside of my control (4)
  - I did not vote, but I could have (5)
  - I did not vote out of protest (6)
- 

ClintonTrump If you absolutely had to choose between only Clinton and Trump, who would you prefer to be the President of the United States?

- Hillary Clinton (1)
  - Donald Trump (2)
-

Congress2018 If an election for U.S. Congress were being held today, who would you vote for in the district where you live?

- The Democratic Party candidate (1)
- The Republican Party candidate (2)
- Other (3)
- Not sure (4)
- I would not vote (5)

*Skip To: IdentCentral\_1 If If an election for U.S. Congress were being held today, who would you vote for in the district wh... != Not sure*

Congress2018\_v2 If you were forced to choose one of the following options (in terms of who you would vote for in the U.S. Congressional election), which would you choose?

- The Democratic Party candidate (1)
- The Republican Party candidate (2)
- Other (3)
- I would not vote (4)

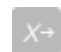

## IdentCentral\_1

"My political attitudes and beliefs are an important reflection of who I am"

- 1 - Strongly agree (1)
  - 2 - Moderately agree (2)
  - 3 - Somewhat agree (3)
  - 4 - Neither agree, nor disagree (4)
  - 5 - Somewhat disagree (5)
  - 6 - Moderately disagree (6)
  - 7 - Strongly disagree (7)
- 

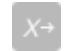

## IdentCentral\_2

"In general, my political attitudes and beliefs are an important part of my self-image"

- 1 - Strongly agree (1)
  - 2 - Moderately agree (2)
  - 3 - Somewhat agree (3)
  - 4 - Neither agree, nor disagree (4)
  - 5 - Somewhat disagree (5)
  - 6 - Moderately disagree (6)
  - 7 - Strongly disagree (7)
- 

Page Break

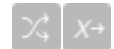

Media1 Some people think that by criticizing leaders, news organizations keep political leaders from doing their job. Others think that such criticism is worth it because it keeps political leaders from doing things that should not be done. Which position is closer to your opinion?

- Criticism from news organizations keeps political leaders from doing their job. (1)
- Criticism from news organizations keeps political leaders from doing things that should not be done. (2)

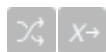

Media2 In presenting the news dealing with political and social issues, do you think that news organizations deal fairly with all sides, or do they tend to favor one side?

- News organizations tend to deal fairly with all sides. (1)
- News organizations tend to favor one side. (2)

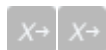

Media3 To what extent do you trust the information that comes from the following?

|                                                        | None at all<br>(1)    | A little (2)          | A moderate<br>amount (3) | A lot (4)             | A great deal<br>(5)   |
|--------------------------------------------------------|-----------------------|-----------------------|--------------------------|-----------------------|-----------------------|
| National news organizations (1)                        | <input type="radio"/> | <input type="radio"/> | <input type="radio"/>    | <input type="radio"/> | <input type="radio"/> |
| Local news organizations (2)                           | <input type="radio"/> | <input type="radio"/> | <input type="radio"/>    | <input type="radio"/> | <input type="radio"/> |
| Friends and family (3)                                 | <input type="radio"/> | <input type="radio"/> | <input type="radio"/>    | <input type="radio"/> | <input type="radio"/> |
| Social networking sites (e.g., Facebook, Twitter) (11) | <input type="radio"/> | <input type="radio"/> | <input type="radio"/>    | <input type="radio"/> | <input type="radio"/> |

Page Break

---

god How strongly do you believe in the existence of a God or Gods?

- 1 - Very little (1)
- 2 (2)
- 3 (3)
- 4 (4)
- 5 (5)
- 6 (6)
- 7 - Very much (7)

**End of Block: Demographics**

---

**Start of Block: Check**

Random Did you respond randomly at any point during the study?

Note: Please be honest! You will get your HIT regardless of your response.

- Yes (1)
- No (2)

---

Google

Did you search the internet (via Google or otherwise) for any of the media sources?



Note: Please be honest! You will get your HIT regardless of your response.

Yes (1)

No (2)

**End of Block: Check**

---

**Start of Block: Comments/ Length**

Comments Do you have any comments about our survey?

---

Length Roughly how long did this survey take you to complete?

---

**End of Block: Comments/ Length**

---

## 12. Full materials – Expert survey

### Start of Block: Instruction

Inst

You will be presented with a series of media sources.

We are interested in two things:

- 1) Whether you are familiar with the media source.
- 2) Whether you trust the information that comes from the media source. That is, in your opinion, does the source produce truthful news content that is relatively unbiased/balanced.

### End of Block: Instruction

---

### Start of Block: Familiarity

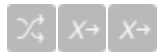

Familiarity Do you recognize the following websites?

|                         | No (0)                | Yes (1)               |
|-------------------------|-----------------------|-----------------------|
| nytimes.com (2)         | <input type="radio"/> | <input type="radio"/> |
| washingtonpost.com (3)  | <input type="radio"/> | <input type="radio"/> |
| usatoday.com (4)        | <input type="radio"/> | <input type="radio"/> |
| wsj.com (5)             | <input type="radio"/> | <input type="radio"/> |
| latimes.com (6)         | <input type="radio"/> | <input type="radio"/> |
| nydailynews.com (7)     | <input type="radio"/> | <input type="radio"/> |
| nypost.com (8)          | <input type="radio"/> | <input type="radio"/> |
| bostonglobe.com (9)     | <input type="radio"/> | <input type="radio"/> |
| sfchronicle.com (10)    | <input type="radio"/> | <input type="radio"/> |
| dailymail.co.uk (11)    | <input type="radio"/> | <input type="radio"/> |
| msnbc.com (12)          | <input type="radio"/> | <input type="radio"/> |
| cnn.com (13)            | <input type="radio"/> | <input type="radio"/> |
| abcnews.go.com (14)     | <input type="radio"/> | <input type="radio"/> |
| foxnews.com (15)        | <input type="radio"/> | <input type="radio"/> |
| cbsnews.com (16)        | <input type="radio"/> | <input type="radio"/> |
| bbc.co.uk (17)          | <input type="radio"/> | <input type="radio"/> |
| news.yahoo.com (18)     | <input type="radio"/> | <input type="radio"/> |
| aol.com/news (19)       | <input type="radio"/> | <input type="radio"/> |
| huffingtonpost.com (20) | <input type="radio"/> | <input type="radio"/> |

|                              |                       |                       |
|------------------------------|-----------------------|-----------------------|
| chicagotribune.com (21)      | <input type="radio"/> | <input type="radio"/> |
| dailykos.com (22)            | <input type="radio"/> | <input type="radio"/> |
| crooksandliars.com (23)      | <input type="radio"/> | <input type="radio"/> |
| dailywire.com (24)           | <input type="radio"/> | <input type="radio"/> |
| redstate.com (25)            | <input type="radio"/> | <input type="radio"/> |
| blacklistednews.com (26)     | <input type="radio"/> | <input type="radio"/> |
| dailycaller.com (27)         | <input type="radio"/> | <input type="radio"/> |
| commondreams.org (28)        | <input type="radio"/> | <input type="radio"/> |
| ijr.com (29)                 | <input type="radio"/> | <input type="radio"/> |
| newsmax.com (30)             | <input type="radio"/> | <input type="radio"/> |
| thepoliticalinsider.com (31) | <input type="radio"/> | <input type="radio"/> |
| activepost.com (32)          | <input type="radio"/> | <input type="radio"/> |
| rawstory.com (33)            | <input type="radio"/> | <input type="radio"/> |
| westernjournal.com (34)      | <input type="radio"/> | <input type="radio"/> |
| conservativetribune.com (35) | <input type="radio"/> | <input type="radio"/> |
| dailysignal.com (36)         | <input type="radio"/> | <input type="radio"/> |
| patriotpost.us (37)          | <input type="radio"/> | <input type="radio"/> |
| antiwar.com (38)             | <input type="radio"/> | <input type="radio"/> |
| thedailysheep.com (39)       | <input type="radio"/> | <input type="radio"/> |
| breitbart.com (40)           | <input type="radio"/> | <input type="radio"/> |

|                                |                       |                       |
|--------------------------------|-----------------------|-----------------------|
| infowars.com (41)              | <input type="radio"/> | <input type="radio"/> |
| clashdaily.com (42)            | <input type="radio"/> | <input type="radio"/> |
| downtrend.com (43)             | <input type="radio"/> | <input type="radio"/> |
| conservativedailypost.com (44) | <input type="radio"/> | <input type="radio"/> |
| onepoliticalplaza.com (45)     | <input type="radio"/> | <input type="radio"/> |
| yournewswire.com (46)          | <input type="radio"/> | <input type="radio"/> |
| bb4sp.com (47)                 | <input type="radio"/> | <input type="radio"/> |
| beforeitsnews.com (48)         | <input type="radio"/> | <input type="radio"/> |
| whatdoesitmean.com (49)        | <input type="radio"/> | <input type="radio"/> |
| socialeverything.com (50)      | <input type="radio"/> | <input type="radio"/> |
| angrypatriotmovement.com (51)  | <input type="radio"/> | <input type="radio"/> |
| channel24news.com (52)         | <input type="radio"/> | <input type="radio"/> |
| freedomdaily.com (53)          | <input type="radio"/> | <input type="radio"/> |
| newsbreakshere.com (54)        | <input type="radio"/> | <input type="radio"/> |
| realnewsrightnow.com (55)      | <input type="radio"/> | <input type="radio"/> |
| notallowedto.com (56)          | <input type="radio"/> | <input type="radio"/> |
| now8news.com (57)              | <input type="radio"/> | <input type="radio"/> |
| react365.com (58)              | <input type="radio"/> | <input type="radio"/> |
| americannews.com (59)          | <input type="radio"/> | <input type="radio"/> |
| dailybuzzlive.com (60)         | <input type="radio"/> | <input type="radio"/> |

thenewyorkevening.com (61)

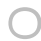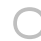

End of Block: Familiarity

---

Start of Block: Trust

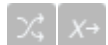

Trust How much do you trust each of these domains?

|                         | <b>Not at all (1)</b> | <b>Barely (2)</b>     | <b>Somewhat (3)</b>   | <b>A lot (4)</b>      | <b>Entirely (5)</b>   |
|-------------------------|-----------------------|-----------------------|-----------------------|-----------------------|-----------------------|
| nytimes.com (2)         | <input type="radio"/> |
| washingtonpost.com (3)  | <input type="radio"/> |
| usatoday.com (4)        | <input type="radio"/> |
| wsj.com (5)             | <input type="radio"/> |
| latimes.com (6)         | <input type="radio"/> |
| nydailynews.com (7)     | <input type="radio"/> |
| nypost.com (8)          | <input type="radio"/> |
| bostonglobe.com (9)     | <input type="radio"/> |
| sfchronicle.com (10)    | <input type="radio"/> |
| dailymail.co.uk (11)    | <input type="radio"/> |
| msnbc.com (12)          | <input type="radio"/> |
| cnn.com (13)            | <input type="radio"/> |
| abcnews.go.com (14)     | <input type="radio"/> |
| foxnews.com (15)        | <input type="radio"/> |
| cbsnews.com (16)        | <input type="radio"/> |
| bbc.co.uk (17)          | <input type="radio"/> |
| news.yahoo.com (18)     | <input type="radio"/> |
| aol.com/news (19)       | <input type="radio"/> |
| huffingtonpost.com (20) | <input type="radio"/> |

|                                 |                       |                       |                       |                       |                       |
|---------------------------------|-----------------------|-----------------------|-----------------------|-----------------------|-----------------------|
| chicagotribune.com (21)         | <input type="radio"/> |
| dailykos.com (22)               | <input type="radio"/> |
| crooksandliars.com (23)         | <input type="radio"/> |
| dailywire.com (24)              | <input type="radio"/> |
| redstate.com (25)               | <input type="radio"/> |
| blacklistednews.com (26)        | <input type="radio"/> |
| dailycaller.com (27)            | <input type="radio"/> |
| commondreams.org (28)           | <input type="radio"/> |
| ijr.com (29)                    | <input type="radio"/> |
| newsmax.com (30)                | <input type="radio"/> |
| thepoliticalinsider.com<br>(31) | <input type="radio"/> |
| activepost.com (32)             | <input type="radio"/> |
| rawstory.com (33)               | <input type="radio"/> |
| westernjournal.com (34)         | <input type="radio"/> |
| conservativetribune.com<br>(35) | <input type="radio"/> |
| dailysignal.com (36)            | <input type="radio"/> |
| patriotpost.us (37)             | <input type="radio"/> |
| antiwar.com (38)                | <input type="radio"/> |
| thedailysheep.com (39)          | <input type="radio"/> |
| breitbart.com (40)              | <input type="radio"/> |



|                                   |                       |                       |                       |                       |                       |
|-----------------------------------|-----------------------|-----------------------|-----------------------|-----------------------|-----------------------|
| infowars.com (41)                 | <input type="radio"/> |
| clashdaily.com (42)               | <input type="radio"/> |
| downtrend.com (43)                | <input type="radio"/> |
| conservativedailypost.com<br>(44) | <input type="radio"/> |
| onepoliticalplaza.com (45)        | <input type="radio"/> |
| yournewswire.com (46)             | <input type="radio"/> |
| bb4sp.com (47)                    | <input type="radio"/> |
| beforeitsnews.com (48)            | <input type="radio"/> |
| whatdoesitmean.com (49)           | <input type="radio"/> |
| socialeverything.com (50)         | <input type="radio"/> |
| angrypatriotmovement.com<br>(51)  | <input type="radio"/> |
| channel24news.com (52)            | <input type="radio"/> |
| freedomdaily.com (53)             | <input type="radio"/> |
| newsbreakshere.com (54)           | <input type="radio"/> |
| realnewsrightnow.com (55)         | <input type="radio"/> |
| notallowedto.com (56)             | <input type="radio"/> |
| now8news.com (57)                 | <input type="radio"/> |
| react365.com (58)                 | <input type="radio"/> |
| americannews.com (59)             | <input type="radio"/> |
| dailybuzzlive.com (60)            | <input type="radio"/> |

thenewyorkevening.com  
(61)

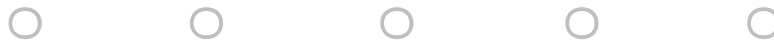

End of Block: Trust

---

Start of Block: Demographics

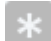

Age What is your age?

---

Sex What is your gender?

- Man (1)
- Woman (2)
- Other (3)

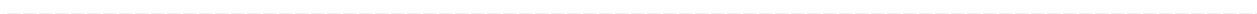

Education What is the highest level of school you have completed or the highest degree you have received?

- Less than high school degree (1)
- High school graduate (high school diploma or equivalent including GED) (2)
- Some college but no degree (3)
- Associate degree in college (2-year) (4)
- Bachelor's degree in college (4-year) (5)
- Master's degree (6)
- Doctoral degree (7)
- Professional degree (JD, MD) (8)
- 

American Are you based in the United States?

- Yes (5)
- No (please specify where) (6) \_\_\_\_\_
- 

Job What is your present position?

- Fact-checker (4)
- Journalist (5)
- Other (please specify) (6) \_\_\_\_\_

**End of Block: Demographics**

---

Start of Block: Comments/ Length

Comments Do you have any comments about our survey?

---

Length Roughly how long did this survey take you to complete?

---

End of Block: Comments/ Length

---

### 13. Supplementary References

1. Hasher L, Goldstein D, Toppino T (1977) Frequency and the conference of referential validity. *J Verbal Learning Verbal Behav* 16(1):107–112.
2. Dechene A, Stahl C, Hansen J, Wanke M (2010) The Truth About the Truth: A Meta-Analytic Review of the Truth Effect. *Personal Soc Psychol Rev* 14(2):238–257.
3. Pennycook G, Cannon TD, Rand DG (2018) Prior Exposure Increases Perceived Accuracy of Fake News. *J Exp Psychol Gen.* <http://dx.doi.org/10.1037/xge0000465>.
